# Supplementary material for: Structural insight into halide-coordinated [Fe4S4XnY4−n]2− clusters (X, Y = Cl, Br, I) by XRD and Mössbauer spectroscopy
Source: Royal Society of Chemistry journal article supplement (doi:10.1039/d2dt03203a), 2022-12-14
Supplement: d2dt03203a1.pdf [file d2dt03203a1.pdf]

Electronic Supplementary Information (ESI)  
for  
Structural insight to halide-coordinated  $[\text{Fe}_4\text{S}_4\text{X}_n\text{Y}_{4-n}]^{2-}$  clusters (X, Y = Cl, Br, I) from  
XRD and Mössbauer spectroscopy

Andreas O. Schüren,<sup>a,b</sup> Benjamin M. Ridgway,<sup>b</sup> Florencia Di Salvo,<sup>b,c</sup> Luca M. Carrella,<sup>d</sup> Verena K. Gramm,<sup>a</sup> Elisa Metzger (née Rothe),<sup>e</sup> Fabio Doctorovich,<sup>b,c</sup> Eva Rentschler,<sup>d</sup> Volker Schünemann,<sup>e</sup> Uwe Ruschewitz,<sup>\*,a</sup> Axel Klein<sup>\*,a</sup>

<sup>a</sup> University zu Köln, Fakultät für Mathematik und Naturwissenschaften, Department für Chemie, Institut für Anorganische Chemie

<sup>b</sup> INQUIMAE-CONICET-Universidad de Buenos Aires, Intendente Güiraldes 2160, Pabellón 2, Piso 3, C1428EGA, Buenos Aires Argentina.

<sup>c</sup> Universidad de Buenos Aires, Facultad de Ciencias Exactas y Naturales, Departamento de Química Inorgánica, Analítica y Química Física, Intendente Güiraldes 2160, Pabellón 2, Piso 3, C1428EGA, Buenos Aires, Argentina.

<sup>d</sup> Johannes Gutenberg-Universität Mainz, Department Chemie, Duesbergweg 10-14, 55128 Mainz, Germany.

<sup>e</sup> Technische Universität Kaiserslautern, Fachbereich Physik, AG Biophysik und medizinische Physik, 67663 Kaiserslautern, Germany.

**Contents:**

A - Experimental Section

B - Supporting Figures

**Fig. S1** Resonance Raman spectra of solid samples of  $(\text{BTMA})_2[\text{Fe}_4\text{S}_4\text{Br}_4]$  (1),  $(\text{BTMA})_2[\text{Fe}_4\text{S}_4\text{Br}_2\text{I}_2]$  (4),  $(\text{BTMA})_2[\text{Fe}_4\text{S}_4\text{Br}_2\text{Cl}_2]$  (2), and  $(\text{BTMA})_2[\text{Fe}_4\text{S}_4\text{Cl}_2\text{I}_2]$  (3) at 458 or 514 nm irradiation.

**Fig. S2** Crystal structure of  $(\text{BTMA})_3[\text{Fe}_6\text{S}_6\text{Cl}_6]$  (6) and view on the prismane cluster trianions  $[\text{Fe}_6\text{S}_6\text{Cl}_6]^{3-}$ .

**Fig. S3** Asymmetric unit for the crystal structure of  $(\text{BTMA})_3[\text{Fe}_6\text{S}_6\text{Cl}_6]$  (6) and completed unit cell.

**Fig. S4** Intermolecular interactions in  $(\text{BTMA})_3[\text{Fe}_6\text{S}_6\text{Cl}_6]$  (6).

**Fig. S5** Orientation of the mixed-halide compounds  $(\text{BTMA})_2[\text{Fe}_4\text{S}_4\text{X}_2\text{Y}_2]$  viewed along the crystallographic *a* axis and overlaid cores of the mixed-halide clusters.

**Fig. S6** Split occupancies and numbering for the  $[\text{Fe}_4\text{S}_4\text{Br}_4]^{2-}$  (A) and the mixed-halide clusters  $[\text{Fe}_4\text{S}_4\text{X}_2\text{Y}_2]^{2-}$  (B, C, and D) with selected S...S and X...X/Y distances (from single crystal XRD of  $(\text{BTMA})_2[\text{Fe}_4\text{S}_4\text{X}_{4-x}\text{Y}_x]$  (X, Y = Cl, Br, I; x = 0 or 2) at 173 K.

**Fig. S7** Powder X-ray diffractogram of  $(\text{BTMA})_3[\text{Fe}_6\text{S}_6\text{Cl}_6]$  (6).

**Fig. S8** <sup>57</sup>Fe Mössbauer spectra of  $(\text{BTMA})_2[\text{Fe}_4\text{S}_4\text{Br}_4]$  (1) and  $(\text{BTMA})_2[\text{Fe}_4\text{S}_4\text{I}_4]$  (5) at 77 K.

**Fig. S9** <sup>57</sup>Fe Mössbauer spectra of  $(\text{BTMA})_2[\text{Fe}_4\text{S}_4\text{Br}_2\text{Cl}_2]$  (2) and  $(\text{BTMA})_2[\text{Fe}_4\text{S}_4\text{Br}_2\text{I}_2]$  (4) at 77 K.

**Fig. S10** <sup>57</sup>Fe Mössbauer spectrum of  $(\text{BTMA})_3[\text{Fe}_6\text{S}_6\text{Cl}_6]$  (6) at 77 K.

**Fig. S11** <sup>57</sup>Fe Mössbauer spectrum of  $(\text{BTMA})_2[\text{Fe}_4\text{S}_4\text{Cl}_2\text{I}_2]$  (3) at 77 K analysed with two “crossed” doublets and a relative area of 1:1.

**Fig. S12** Temperature dependence of molar magnetic susceptibility depicted as  $\chi_{\text{M}}T$  vs. *T* for  $(\text{BTMA})_2[\text{Fe}_4\text{S}_4\text{Br}_4]$  (1),  $(\text{BTMA})_2[\text{Fe}_4\text{S}_4\text{Br}_2\text{Cl}_2]$  (2),  $(\text{BTMA})_2[\text{Fe}_4\text{S}_4\text{Cl}_2\text{I}_2]$  (3), and  $(\text{BTMA})_2[\text{Fe}_4\text{S}_4\text{Br}_2\text{I}_2]$  (4).

**Fig. S13** Temperature dependence of molar magnetic susceptibility depicted as  $\chi_{\text{M}}T$  vs. *T* for  $(\text{BTMA})_2[\text{Fe}_4\text{S}_4\text{Br}_4]$  (1),  $(\text{BTMA})_2[\text{Fe}_4\text{S}_4\text{Br}_2\text{Cl}_2]$  (2),  $(\text{BTMA})_2[\text{Fe}_4\text{S}_4\text{Cl}_2\text{I}_2]$  (3), and  $(\text{BTMA})_2[\text{Fe}_4\text{S}_4\text{Br}_2\text{I}_2]$  (4).

**Fig. S14** Temperature dependence of molar magnetic susceptibility depicted as  $\chi_{\text{M}}T$  vs. *T* for  $(\text{BTMA})_2[\text{Fe}_4\text{S}_4\text{Br}_4]$  (1),  $(\text{BTMA})_2[\text{Fe}_4\text{S}_4\text{Br}_2\text{Cl}_2]$  (2),  $(\text{BTMA})_2[\text{Fe}_4\text{S}_4\text{Cl}_2\text{I}_2]$  (3), and  $(\text{BTMA})_2[\text{Fe}_4\text{S}_4\text{Br}_2\text{I}_2]$  (4).

C - Supporting Tables

**Table S1.** Selected crystallographic and refinement data for  $(\text{BTMA})_2[\text{Fe}_4\text{S}_4\text{Br}_4]$ .

**Table S2** Essential metrics of  $[\text{Fe}_4\text{S}_4\text{Br}_4]^{2-}$ .

**Table S3.** Selected crystallographic and refinement data for  $(\text{BTMA})_2[\text{Fe}_4\text{S}_4\text{X}_2\text{Y}_2]$  with X,Y = Cl, Br, I.

**Table S4.** Selected crystallographic and refinement data for  $(\text{BTMA})_2[\text{Fe}_4\text{S}_4\text{Br}_2\text{I}_2]$ .

**Table S5** Selected metrics of (BTMA)<sub>2</sub>[Fe<sub>4</sub>S<sub>4</sub>X<sub>4</sub>] and (BTMA)<sub>2</sub>[Fe<sub>4</sub>S<sub>4</sub>X<sub>2</sub>Y<sub>2</sub>] with X,Y = Cl, Br, I. Part I.

**Table S6** Selected metrics of (BTMA)<sub>2</sub>[Fe<sub>4</sub>S<sub>4</sub>X<sub>4</sub>] and (BTMA)<sub>2</sub>[Fe<sub>4</sub>S<sub>4</sub>X<sub>2</sub>Y<sub>2</sub>] with X,Y = Cl, Br, I, Part II.

**Table S7** Metrical data showing the Fe<sub>4</sub> tetrahedron distortion and compression in (Q)<sub>2</sub>[Fe<sub>4</sub>S<sub>4</sub>X<sub>4</sub>] and (Q)<sub>2</sub>[Fe<sub>4</sub>S<sub>4</sub>X<sub>2</sub>Y<sub>2</sub>] structures with X, Y = Cl, Br, I and Q = Ph<sub>4</sub>P<sup>+</sup>, Et<sub>4</sub>N<sup>+</sup>, and nPr<sub>4</sub>N<sup>+</sup>.

**Table S8** Selected crystallographic and refinement data for (BTMA)<sub>3</sub>[Fe<sub>6</sub>S<sub>6</sub>Cl<sub>6</sub>] (**6**).

**Table S9** Essential metrics in [Fe<sub>6</sub>S<sub>6</sub>Cl<sub>6</sub>]<sup>2-</sup>.

**Table S10** Freely refined halide ratios in (BTMA)<sub>2</sub>[Fe<sub>4</sub>S<sub>4</sub>X<sub>2</sub>Y<sub>2</sub>] structures.

## A - Experimental Section

### Materials and procedures

The compounds were prepared and crystallised following already published procedures<sup>1</sup> by diffusion techniques from layered MeCN/diethyl ether mixtures at -18 °C over a period of 3 weeks. After filtration, washing with diethyl ether and drying under anaerobic and dry atmosphere (argon) using *Schlenck* techniques the opaque black rod shape crystals were stored and prepared for analytics in an argon-filled glove box at room temperature. A sample of (BTMA)<sub>2</sub>[Fe<sub>4</sub>S<sub>4</sub>I<sub>4</sub>] (**5**) for Mössbauer studies was taken from the batches of the previous study.<sup>1</sup> The UV-vis-NIR absorption data for the compounds in MeCN solution was previously reported.<sup>1</sup>

**(BTMA)<sub>2</sub>[Fe<sub>4</sub>S<sub>4</sub>Br<sub>4</sub>] (**1**).** Black needle-shaped crystals. **Yield:** 4.20 g (87%). **ESI-MS(-)** (acetone): m/z (%) = 335.6479 (100) [Fe<sub>4</sub>S<sub>4</sub>Br<sub>4</sub>]<sup>2-</sup>, 821.4260 (60) [BTMA+Fe<sub>4</sub>S<sub>4</sub>Br<sub>4</sub>]<sup>-</sup>, 590.3813 (4) [Fe<sub>4</sub>S<sub>4</sub>Br<sub>3</sub>]<sup>-</sup>, 622.3710 (4) [Fe<sub>4</sub>S<sub>4</sub>Br<sub>3</sub>O<sub>2</sub>]<sup>-</sup>, 671.2970 (4) [Fe<sub>4</sub>S<sub>4</sub>Br<sub>4</sub>]<sup>-</sup>, 694.2866 (2) [Na+Fe<sub>4</sub>S<sub>4</sub>Br<sub>4</sub>]<sup>-</sup>, 678.3131 (7) [Li+Fe<sub>4</sub>S<sub>4</sub>Br<sub>4</sub>]<sup>-</sup>. **Elemental analysis** for C<sub>20</sub>H<sub>32</sub>Br<sub>4</sub>Fe<sub>4</sub>N<sub>2</sub>S<sub>4</sub> (971.37): calcd. C 24.72, H 3.32, N 2.88, S 13.20; found C 24.70, H 3.33, N 2.88, S 13.21. **FIR** (PE pellet): ν<sub>max</sub> (cm<sup>-1</sup>): 610 (w), 515 (w), 453 (m), 418 (w), 377 (s), 307 (s), 269 (w), 260 (sh), 227 (m), 214 (w).

**(BTMA)<sub>2</sub>[Fe<sub>4</sub>S<sub>4</sub>Br<sub>2</sub>Cl<sub>2</sub>] (**2**)** Black needle-shaped crystals. **Yield:** 7.81 g (89%). **ESI-MS(-)** (acetone): m/z (%) = 335.6492 (44) [Fe<sub>4</sub>S<sub>4</sub>Br<sub>4</sub>]<sup>2-</sup>, 313.6743 (90) [Fe<sub>4</sub>S<sub>4</sub>Br<sub>3</sub>Cl]<sup>2-</sup>, 291.6992 (100) [Fe<sub>4</sub>S<sub>4</sub>Br<sub>2</sub>Cl<sub>2</sub>]<sup>2-</sup>, 268.7258 (19) [Fe<sub>4</sub>S<sub>4</sub>BrCl<sub>3</sub>]<sup>2-</sup>, 245.7521 (43) [Fe<sub>4</sub>S<sub>4</sub>Cl<sub>4</sub>]<sup>2-</sup>, 821.4248 (11) [BTMA+Fe<sub>4</sub>S<sub>4</sub>Br<sub>4</sub>]<sup>-</sup>, 777.4755 (36) [BTMA+Fe<sub>4</sub>S<sub>4</sub>Br<sub>3</sub>Cl]<sup>-</sup>, 731.5284 (47) [BTMA+Fe<sub>4</sub>S<sub>4</sub>Br<sub>2</sub>Cl<sub>2</sub>]<sup>-</sup>, 687.5786 (27) [BTMA+Fe<sub>4</sub>S<sub>4</sub>BrCl<sub>3</sub>]<sup>-</sup>, 643.6280 (6) [BTMA+Fe<sub>4</sub>S<sub>4</sub>Cl<sub>4</sub>]<sup>-</sup>, 590.3805 (2) [Fe<sub>4</sub>S<sub>4</sub>Br<sub>3</sub>]<sup>-</sup>, 546.4314 (13) [Fe<sub>4</sub>S<sub>4</sub>Br<sub>2</sub>Cl]<sup>-</sup>, 502.4818 (24) [Fe<sub>4</sub>S<sub>4</sub>BrCl<sub>2</sub>]<sup>-</sup>, 456.5348 (11) [Fe<sub>4</sub>S<sub>4</sub>Cl<sub>3</sub>]<sup>-</sup>, 622.3699 (1) [Fe<sub>4</sub>S<sub>4</sub>Br<sub>3</sub>O<sub>2</sub>]<sup>-</sup>, 578.4210 (10) [Fe<sub>4</sub>S<sub>4</sub>Br<sub>2</sub>ClO<sub>2</sub>]<sup>-</sup>, 534.4714 (17) [Fe<sub>4</sub>S<sub>4</sub>BrCl<sub>2</sub>O<sub>2</sub>]<sup>-</sup>, 488.5246 (8) [Fe<sub>4</sub>S<sub>4</sub>Cl<sub>3</sub>O<sub>2</sub>]<sup>-</sup>. **Elemental analysis** for C<sub>20</sub>H<sub>32</sub>Cl<sub>2</sub>Br<sub>2</sub>Fe<sub>4</sub>N<sub>2</sub>S<sub>4</sub> (882.47): calcd. C 27.21, H 3.17, N 3.65, S 14.53; found C 27.20, H 3.18, N 3.64, S 14.55. **FIR** (PE pellet): ν<sub>max</sub> (cm<sup>-1</sup>): 609 (w), 515 (w), 453 (m), 419 (w), 378 (m), 356 (s), 347 (sh), 306 (s), 270 (m), 260 (sh), 233 (m).

**(BTMA)<sub>2</sub>[Fe<sub>4</sub>S<sub>4</sub>Cl<sub>2</sub>I<sub>2</sub>] (**3**)** Black needle-shaped crystals. **Yield:** 7.48 g (77%). **ESI-MS(-)** (acetone): m/z (%) = 429.6239 (42) [Fe<sub>4</sub>S<sub>4</sub>I<sub>4</sub>]<sup>2-</sup>, 383.6560 (100) [Fe<sub>4</sub>S<sub>4</sub>ClI<sub>3</sub>]<sup>2-</sup>, 337.6883 (46) [Fe<sub>4</sub>S<sub>4</sub>Cl<sub>2</sub>I<sub>2</sub>]<sup>2-</sup>, 292.7184 (3) [Fe<sub>4</sub>S<sub>4</sub>ClI]<sup>2-</sup>, 245.7523 (19) [Fe<sub>4</sub>S<sub>4</sub>Cl<sub>4</sub>]<sup>2-</sup>, 1009.3728 (2) [BTMA+Fe<sub>4</sub>S<sub>4</sub>I<sub>4</sub>]<sup>-</sup>, 917.4389 (9) [BTMA+Fe<sub>4</sub>S<sub>4</sub>ClI<sub>3</sub>]<sup>-</sup>, 825.5033 (15) [BTMA+Fe<sub>4</sub>S<sub>4</sub>Cl<sub>2</sub>I<sub>2</sub>]<sup>-</sup>, 733.5675 (9) [BTMA+Fe<sub>4</sub>S<sub>4</sub>ClI]<sup>-</sup>, 643.6284 (3) [BTMA+Fe<sub>4</sub>S<sub>4</sub>Cl<sub>4</sub>]<sup>-</sup>, 732.3404 (<1) [Fe<sub>4</sub>S<sub>4</sub>I<sub>3</sub>]<sup>-</sup>, 640.4057 (7) [Fe<sub>4</sub>S<sub>4</sub>ClI<sub>2</sub>]<sup>-</sup>, 548.4708 (21) [Fe<sub>4</sub>S<sub>4</sub>Cl<sub>2</sub>I]<sup>-</sup>, 456.5353 (16) [Fe<sub>4</sub>S<sub>4</sub>Cl<sub>3</sub>]<sup>-</sup>, 764.3302 (<1) [Fe<sub>4</sub>S<sub>4</sub>I<sub>3</sub>O<sub>2</sub>]<sup>-</sup>, 672.3954 (5) [Fe<sub>4</sub>S<sub>4</sub>ClI<sub>2</sub>O<sub>2</sub>]<sup>-</sup>, 580.4606 (17) [Fe<sub>4</sub>S<sub>4</sub>Cl<sub>2</sub>I<sub>2</sub>O<sub>2</sub>]<sup>-</sup>, 488.5251 (12) [Fe<sub>4</sub>S<sub>4</sub>Cl<sub>3</sub>O<sub>2</sub>]<sup>-</sup>. **Elemental analysis** for C<sub>20</sub>H<sub>32</sub>Cl<sub>2</sub>I<sub>2</sub>Fe<sub>4</sub>N<sub>2</sub>S<sub>4</sub> (976.47): calcd. C 24.59, H 3.30, N 2.87, S 13.13; found C 24.57, H 3.31, N 2.88, S 13.15. **FIR** (PE pellet): ν<sub>max</sub> (cm<sup>-1</sup>): 609 (w), 513 (w), 452 (m), 416 (w), 378 (s), 356 (s), 346 (sh), 290 (s), 272 (m), 260 (m), 228 (m), 212 (m).

**(BTMA)<sub>2</sub>[Fe<sub>4</sub>S<sub>4</sub>Br<sub>2</sub>I<sub>2</sub>] (**4**)** Black needle-shaped crystals. **Yield:** 9.03 g (85%). **ESI-MS(-)** (acetone): m/z (%) = 429.6232 (28) [Fe<sub>4</sub>S<sub>4</sub>I<sub>4</sub>]<sup>2-</sup>, 405.6303 (72) [Fe<sub>4</sub>S<sub>4</sub>BrI<sub>3</sub>]<sup>2-</sup>, 382.6360 (96) [Fe<sub>4</sub>S<sub>4</sub>Br<sub>2</sub>I<sub>2</sub>]<sup>2-</sup>, 359.6419 (42) [Fe<sub>4</sub>S<sub>4</sub>BrI]<sup>2-</sup>, 335.6488 (14) [Fe<sub>4</sub>S<sub>4</sub>Br<sub>4</sub>]<sup>2-</sup>, 1009.3717 (2) [BTMA+Fe<sub>4</sub>S<sub>4</sub>I<sub>4</sub>]<sup>-</sup>, 961.3868 (7) [BTMA+Fe<sub>4</sub>S<sub>4</sub>BrI<sub>3</sub>]<sup>-</sup>, 915.3993 (14) [BTMA+Fe<sub>4</sub>S<sub>4</sub>Br<sub>2</sub>I<sub>2</sub>]<sup>-</sup>, 867.4132 (9) [BTMA+Fe<sub>4</sub>S<sub>4</sub>BrI]<sup>-</sup>, 821.4241 (2) [BTMA+Fe<sub>4</sub>S<sub>4</sub>Br<sub>4</sub>]<sup>-</sup>, 732.3395 (<1) [Fe<sub>4</sub>S<sub>4</sub>I<sub>3</sub>]<sup>-</sup>, 684.3543 (2) [Fe<sub>4</sub>S<sub>4</sub>BrI<sub>2</sub>]<sup>-</sup>, 638.3662 (5) [Fe<sub>4</sub>S<sub>4</sub>Br<sub>2</sub>I]<sup>-</sup>, 590.3805 (6) [Fe<sub>4</sub>S<sub>4</sub>Br<sub>3</sub>]<sup>-</sup>, 764.3295 (<1) [Fe<sub>4</sub>S<sub>4</sub>I<sub>3</sub>O<sub>2</sub>]<sup>-</sup>, 716.3439 (1) [Fe<sub>4</sub>S<sub>4</sub>BrI<sub>2</sub>O<sub>2</sub>]<sup>-</sup>, 670.3558 (4) [Fe<sub>4</sub>S<sub>4</sub>Br<sub>2</sub>I<sub>2</sub>O<sub>2</sub>]<sup>-</sup>, 622.3701 (4) [Fe<sub>4</sub>S<sub>4</sub>Br<sub>3</sub>O<sub>2</sub>]<sup>-</sup>. **Elemental analysis** for C<sub>20</sub>H<sub>32</sub>Br<sub>2</sub>I<sub>2</sub>Fe<sub>4</sub>N<sub>2</sub>S<sub>4</sub> (1065.37): calcd. C 22.54, H 3.03, N 2.63, S

12.03; found C 22.55, H 3.01, N 2.61, S 12.01. **FIR** (PE pellet):  $\nu_{\max}$  ( $\text{cm}^{-1}$ ): 609 (w), 514 (w), 452 (m), 416 (w), 376 (s), 306 (s), 291 (s), 272 (m), 260 (m), 232 (m), 210 (m).

**(BTMA)<sub>3</sub>[Fe<sub>6</sub>S<sub>6</sub>Cl<sub>6</sub>] (6)** Black column-shaped crystals. **Yield:** 7.18 g (91%). **Elemental analysis** for C<sub>30</sub>H<sub>48</sub>Cl<sub>6</sub>Fe<sub>6</sub>N<sub>3</sub>S<sub>6</sub> (1190.35): calcd. C 30.26, H 4.06, N 3.53, S 16.16; found C 30.30, H 4.05, N 3.51, S 16.17. **FIR** (PE pellet):  $\nu_{\max}$  ( $\text{cm}^{-1}$ ): 612 (w), 513 (w), 454 (m), 419 (w), 381 (sh), 351 (s), 300 (m), 283 (sh), 250 (sh), 200 (w), 214 (w).

## B - Supporting Figures

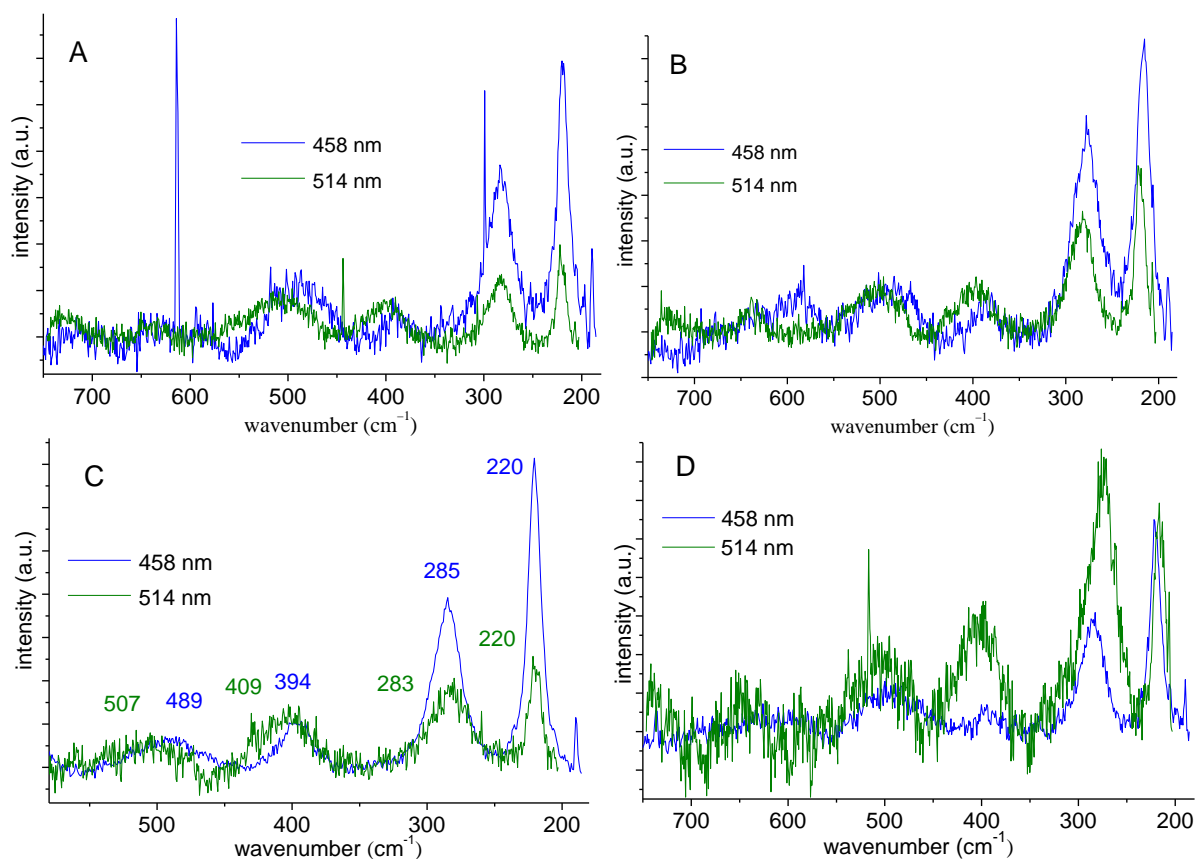

**Fig. S1** Resonance Raman spectra of solid samples of (BTMA)<sub>2</sub>[Fe<sub>4</sub>S<sub>4</sub>Br<sub>4</sub>] (1) (A), (BTMA)<sub>2</sub>[Fe<sub>4</sub>S<sub>4</sub>Br<sub>2</sub>I<sub>2</sub>] (4) (B), (BTMA)<sub>2</sub>[Fe<sub>4</sub>S<sub>4</sub>Br<sub>2</sub>Cl<sub>2</sub>] (2) (C), and (BTMA)<sub>2</sub>[Fe<sub>4</sub>S<sub>4</sub>Cl<sub>2</sub>I<sub>2</sub>] (3) (D) at 458 or 514 nm irradiation.

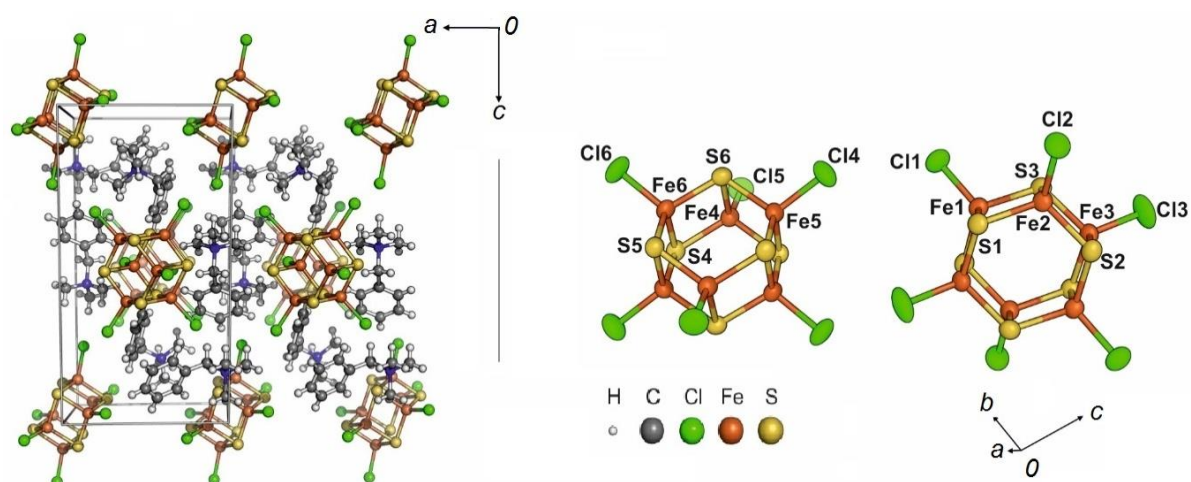

**Fig. S2** Crystal structure of  $(\text{BTMA})_3[\text{Fe}_6\text{S}_6\text{Cl}_6]$  (**6**) (left; viewed along crystallographic  $b$  axis) and views on the prismane cluster trianions  $[\text{Fe}_6\text{S}_6\text{Cl}_6]^{3-}$  (right).

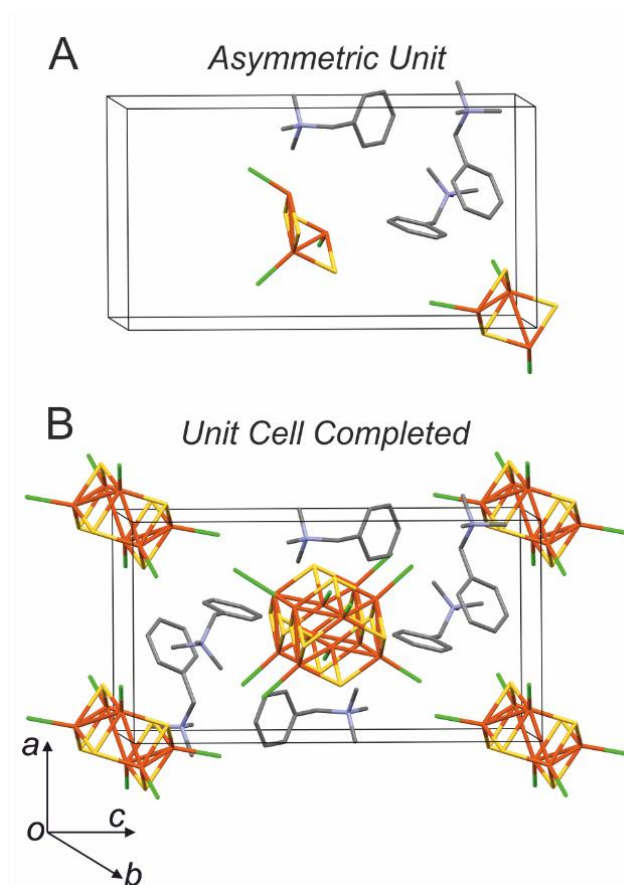

**Fig. S3** Asymmetric unit for the crystal structure of  $(\text{BTMA})_3[\text{Fe}_6\text{S}_6\text{Cl}_6]$  (**6**) (A) and completed unit cell (B).

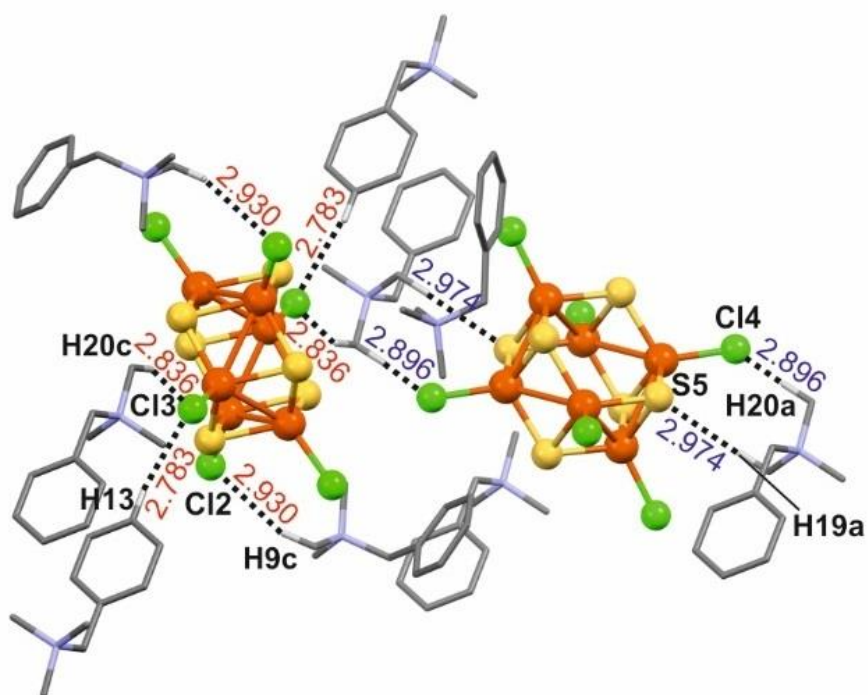

**Fig. S4** Intermolecular interactions in  $(\text{BTMA})_3[\text{Fe}_6\text{S}_6\text{Cl}_6]$  (**6**). Only H atoms involved in the short contacts are shown; distances are in Å.

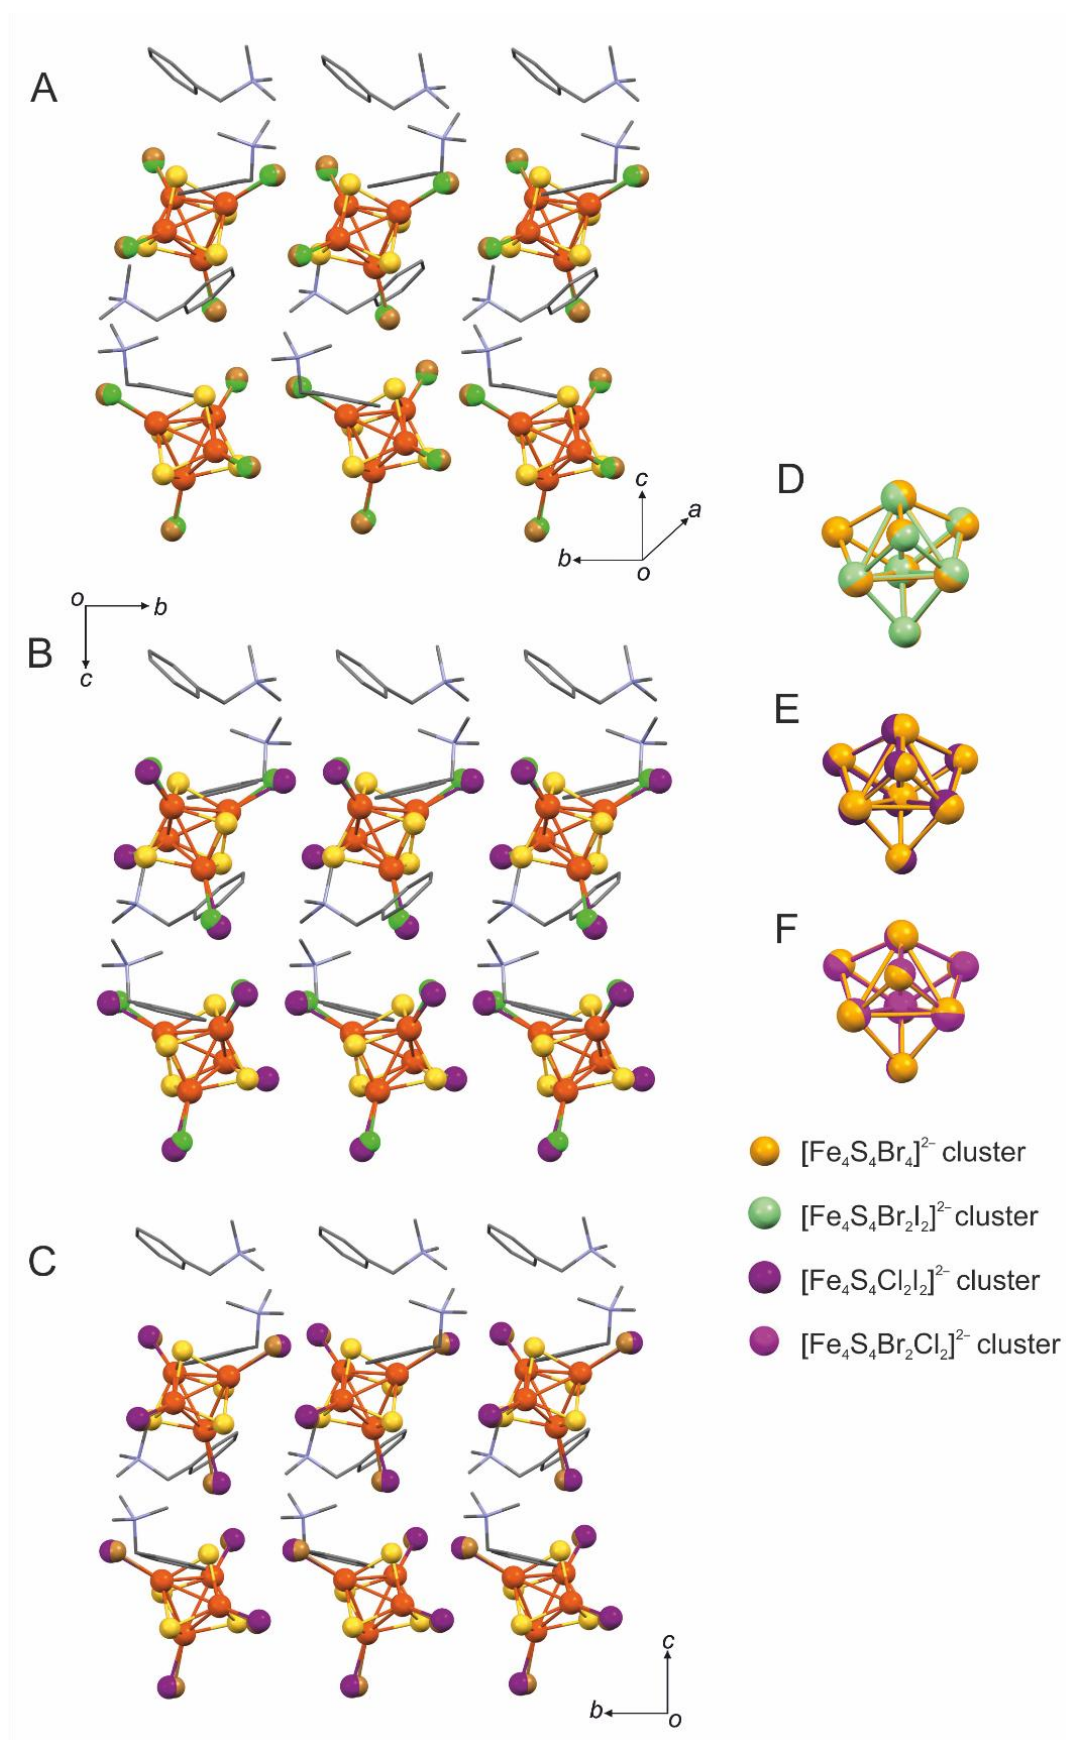

**Fig. S5** Orientation of the mixed-halide compounds  $(\text{BTMA})_2[\text{Fe}_4\text{S}_4\text{X}_2\text{Y}_2]$  (A:  $\text{Cl}_2\text{Br}_2$ , B:  $\text{Br}_2\text{I}_2$ , C:  $\text{Cl}_2\text{I}_2$ ), viewed along the crystallographic  $a$  axis and overlaid cores of the mixed-halide clusters (D, E, and F).

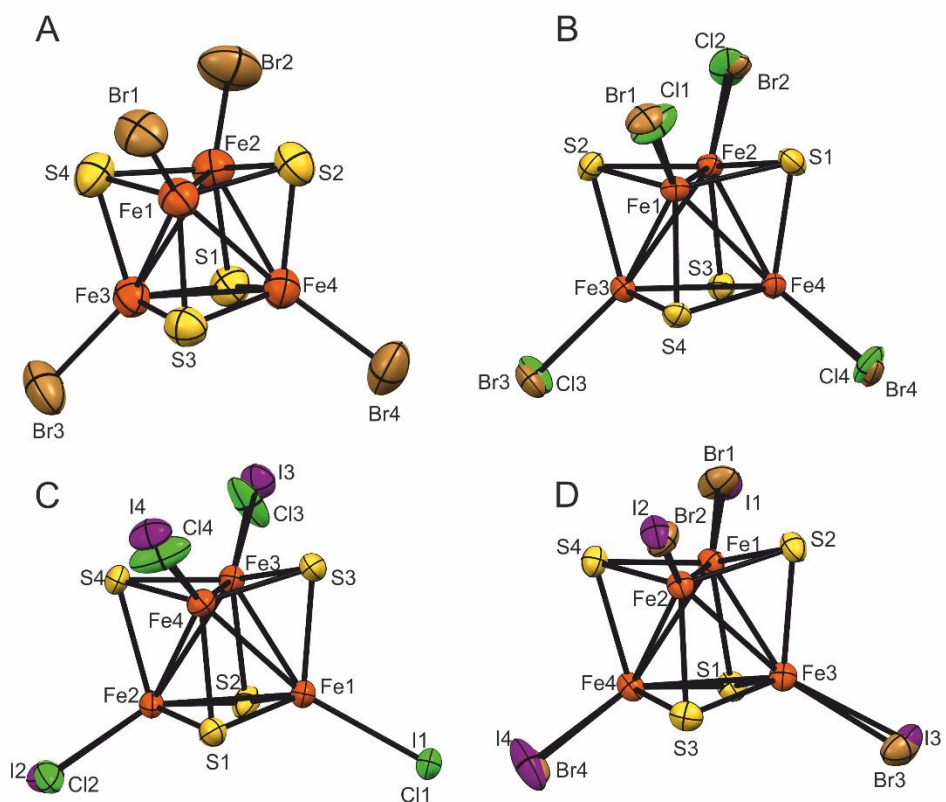

**Fig. S6** Split occupancies and numbering for the  $[\text{Fe}_4\text{S}_4\text{Br}_4]^{2-}$  (A) and the mixed-halide clusters  $[\text{Fe}_4\text{S}_4\text{X}_2\text{Y}_2]^{2-}$  (B, C, and D) with selected Fe...Fe distances (from single crystal XRD of  $(\text{BTMA})_2[\text{Fe}_4\text{S}_4\text{X}_{4-x}\text{Y}_x]$  ( $\text{X}, \text{Y} = \text{Cl}, \text{Br}, \text{I}; x = 0 \text{ or } 2$ ) at 173 K.



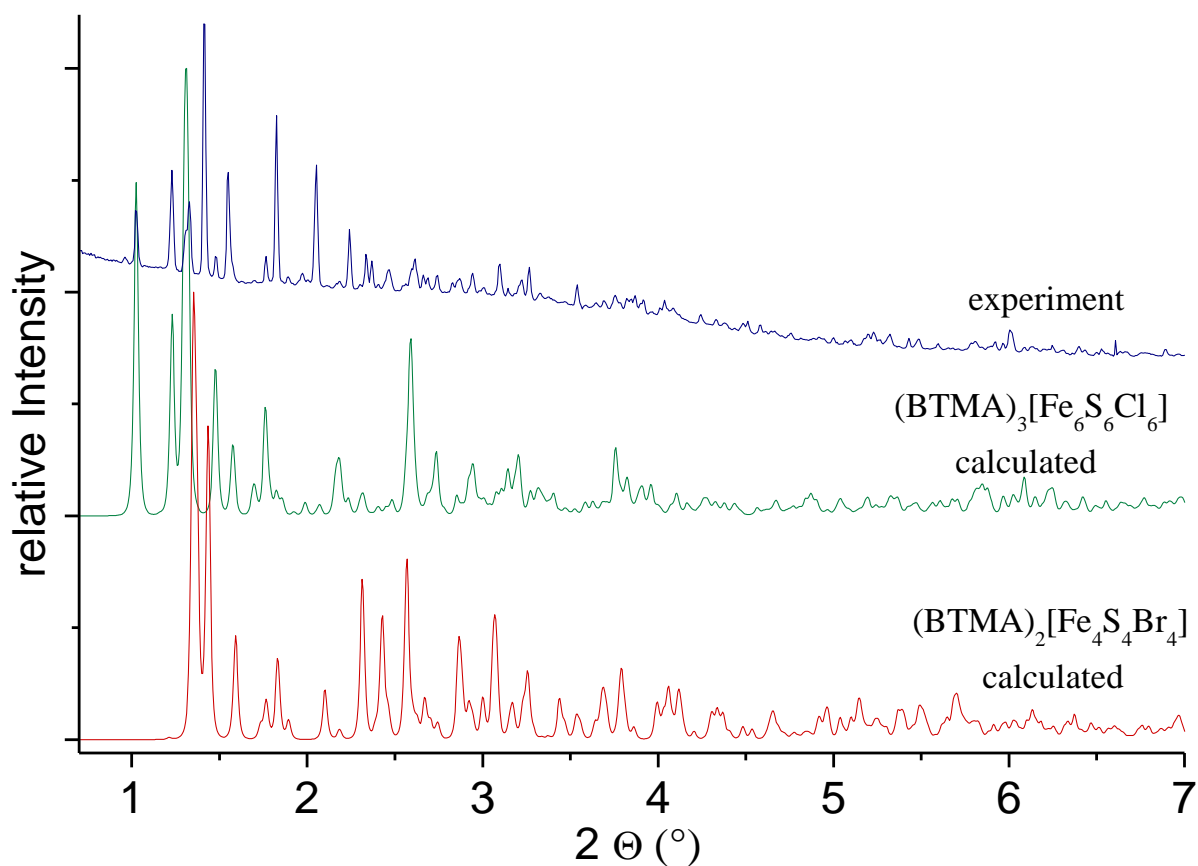

**Fig. S7** Powder X-ray diffractogram of  $(\text{BTMA})_3[\text{Fe}_6\text{S}_6\text{Cl}_6]$  (**6**) recorded at 298 K (Beamline P02.1, DESY, Hamburg/Germany;  $\lambda = 0.207203 \text{ \AA}$ ). For comparison, the simulated PXRD patterns of  $(\text{BTMA})_3[\text{Fe}_6\text{S}_6\text{Cl}_6]$  (**6**) and  $(\text{BTMA})_2[\text{Fe}_4\text{S}_4\text{Br}_4]$  (**1**) calculated from the known single crystal XRD data are shown.

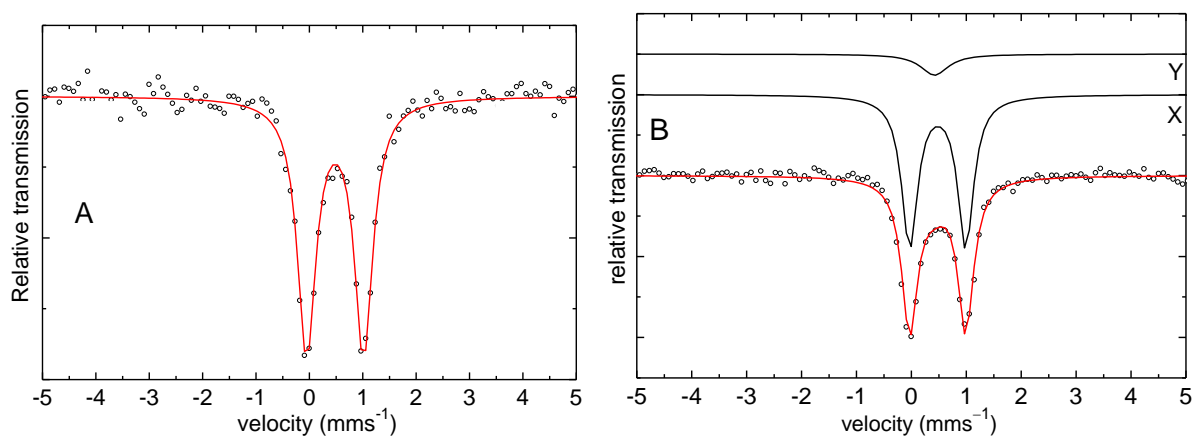

**Fig. S8**  $^{57}\text{Fe}$  Mössbauer spectra of  $(\text{BTMA})_2[\text{Fe}_4\text{S}_4\text{Br}_4]$  (**1**) (A) and  $(\text{BTMA})_2[\text{Fe}_4\text{S}_4\text{I}_4]$  (**5**) (B) at 77 K (dots: collected data, red line curve fits with parameters given in Table 3 in the manuscript or in the text). The minor species Y in the B plot with  $\delta = 0.42 \text{ mm}\cdot\text{s}^{-1}$ ,  $\Delta E_Q = 0 \text{ mm}\cdot\text{s}^{-1}$  and  $\Gamma = 0.61 \text{ mm}\cdot\text{s}^{-1}$  accounts to 11% and has parameters typical of  $(\text{NET}_4)[\text{FeI}_4]$ .<sup>2</sup>



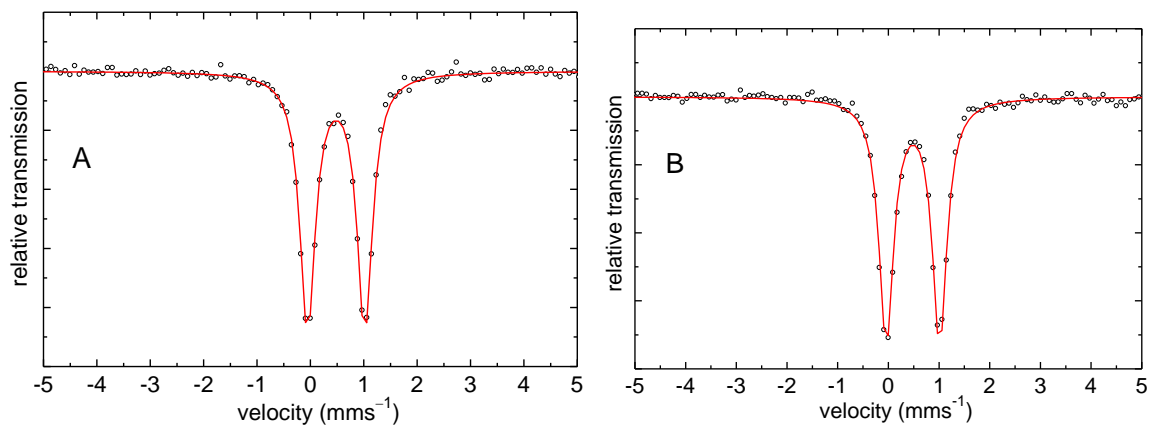

**Fig. S9**  $^{57}\text{Fe}$  Mössbauer spectra of  $(\text{BTMA})_2[\text{Fe}_4\text{S}_4\text{Br}_2\text{Cl}_2]$  (**2**) (A) and  $(\text{BTMA})_2[\text{Fe}_4\text{S}_4\text{Br}_2\text{I}_2]$  (**4**) (B) at 77 K (dots: collected data, red line curve fit with parameters given in Table 3).

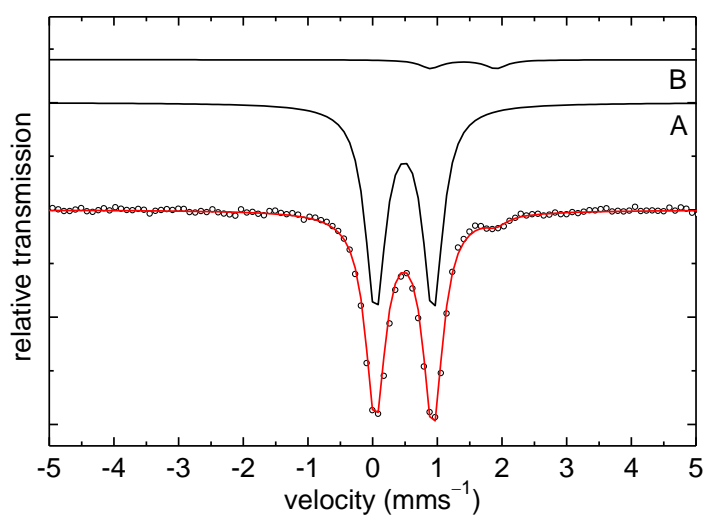

**Fig. S10**  $^{57}\text{Fe}$  Mössbauer spectrum of  $(\text{BTMA})_3[\text{Fe}_6\text{S}_6\text{Cl}_6]$  (**6**) at 77 K (dots: collected data, red line curve fit with parameters given in Table 3). The minor species B with  $\delta = 1.40 \text{ mm}\cdot\text{s}^{-1}$ ,  $\Delta E_Q = 1.01 \text{ mm}\cdot\text{s}^{-1}$ , and  $\Gamma = 0.40 \text{ mm}\cdot\text{s}^{-1}$  accounts to 4% and has parameters typical of  $\text{FeCl}_2$ .<sup>3</sup>

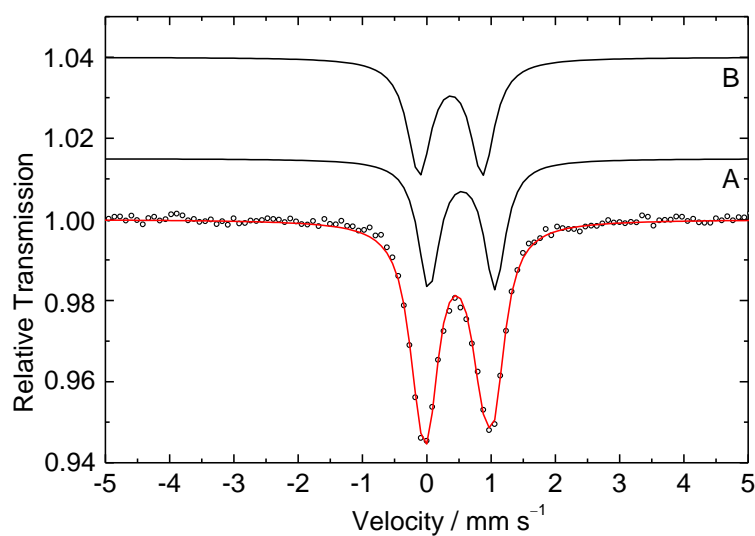

**Fig. S11**  $^{57}\text{Fe}$  Mössbauer spectrum of  $(\text{BTMA})_2[\text{Fe}_4\text{S}_4\text{Cl}_2\text{I}_2]$  (**3**) at 77 K analysed with two “crossed” doublets and a relative area of 1:1 (dots: collected data, black line curve A: fit with  $\delta_A = 0.54 \text{ mm}\cdot\text{s}^{-1}$ ,  $\Delta E_{QA} = 1.03 \text{ mm}\cdot\text{s}^{-1}$ ,  $\Gamma_A = 0.40 \text{ mm}\cdot\text{s}^{-1}$  and B:  $\delta_B = 0.37 \text{ mm}\cdot\text{s}^{-1}$ ,  $\Delta E_{QB} = 0.98 \text{ mm}\cdot\text{s}^{-1}$ ,  $\Gamma_B = 0.45 \text{ mm}\cdot\text{s}^{-1}$ ).

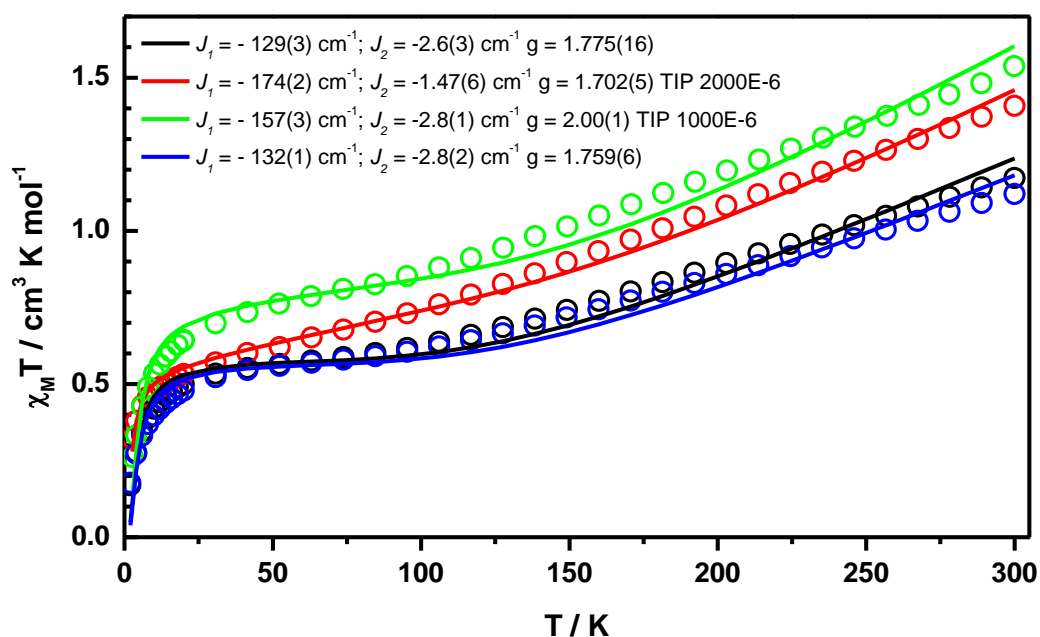

**Fig. S12** Temperature dependence of molar magnetic susceptibility depicted as  $\chi_M T$  vs.  $T$  for homoleptic cluster  $(\text{BTMA})_2[\text{Fe}_4\text{S}_4\text{Br}_4]$  (1) (black) and heteroleptic clusters  $(\text{BTMA})_2[\text{Fe}_4\text{S}_4\text{Br}_2\text{Cl}_2]$  (2) (green),  $(\text{BTMA})_2[\text{Fe}_4\text{S}_4\text{Cl}_2\text{I}_2]$  (3) (red), and  $(\text{BTMA})_2[\text{Fe}_4\text{S}_4\text{Br}_2\text{I}_2]$  (4) (blue). The solid lines correspond to the best fit obtained with the HDvV-Hamiltonian with the given parameter  $J_1$ ,  $J_2$ , and  $g$ . Additional a TIP was included for  $(\text{BTMA})_2[\text{Fe}_4\text{S}_4\text{Br}_2\text{Cl}_2]$  (2) (green) and  $(\text{BTMA})_2[\text{Fe}_4\text{S}_4\text{Cl}_2\text{I}_2]$  (3) (red).

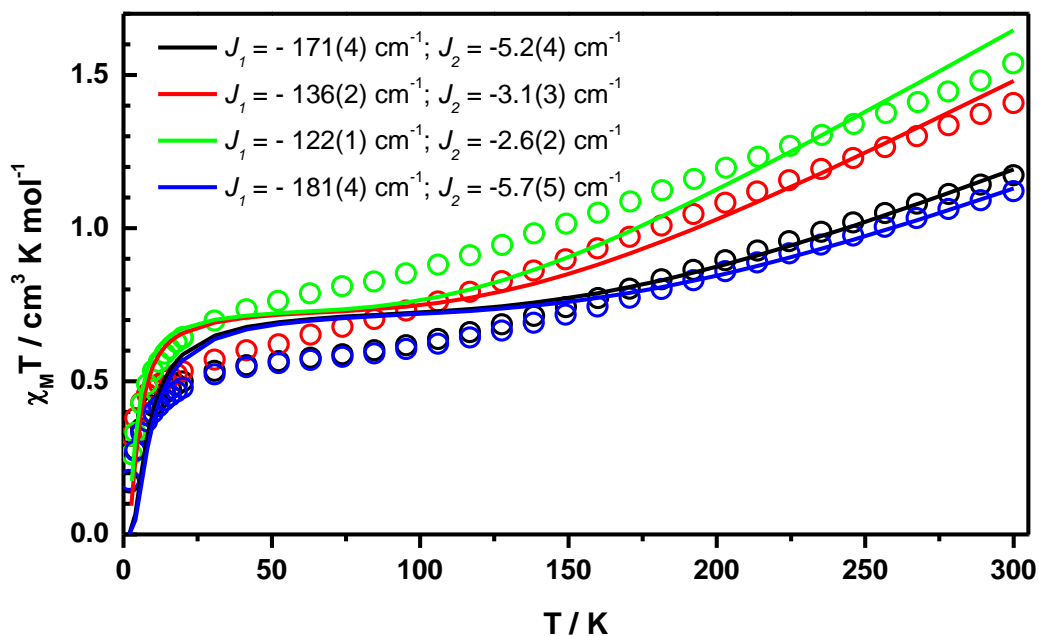

**Fig. S13** Temperature dependence of molar magnetic susceptibility depicted as  $\chi_M T$  vs.  $T$  for homoleptic cluster  $(\text{BTMA})_2[\text{Fe}_4\text{S}_4\text{Br}_4]$  (1) (black) and heteroleptic clusters  $(\text{BTMA})_2[\text{Fe}_4\text{S}_4\text{Br}_2\text{Cl}_2]$  (2) (green),  $(\text{BTMA})_2[\text{Fe}_4\text{S}_4\text{Cl}_2\text{I}_2]$  (3) (red), and  $(\text{BTMA})_2[\text{Fe}_4\text{S}_4\text{Br}_2\text{I}_2]$  (4) (blue). The solid lines correspond to the best fit obtained with the HDvV-Hamiltonian with the given parameter  $J_1$ ,  $J_2$ , and fixed  $g = 2.00$ .

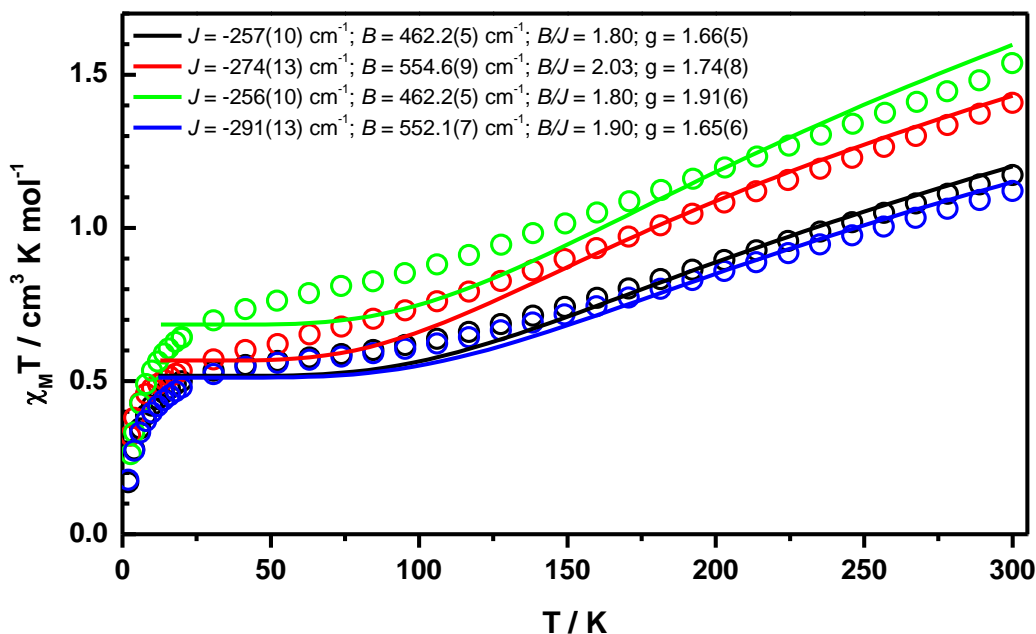

**Fig. S14** Temperature dependence of molar magnetic susceptibility depicted as  $\chi_M T$  vs.  $T$  for homoleptic cluster  $(\text{BTMA})_2[\text{Fe}_4\text{S}_4\text{Br}_4]$  (1) (black) and heteroleptic clusters  $(\text{BTMA})_2[\text{Fe}_4\text{S}_4\text{Br}_2\text{Cl}_2]$  (2) (green),  $(\text{BTMA})_2[\text{Fe}_4\text{S}_4\text{Cl}_2\text{I}_2]$  (3) (red), and  $(\text{BTMA})_2[\text{Fe}_4\text{S}_4\text{Br}_2\text{I}_2]$  (4) (blue). The solid lines correspond to the best fit obtained with the Bleany-Bowers equation derived from HDE with the given parameter  $J$ ,  $B$ , and  $g$ .

Bleany-Bowers equation derived from the Heisenberg double-exchange (HDE)<sup>10</sup>:

$$E_{\pm} = -JS(S+1) \pm B(S + \frac{1}{2}) \quad (1)$$

$$\chi_M T = \frac{N_A g^2 \mu_B^2}{4k} \cdot \frac{e^{4y}(e^{2y}+1) + 10e^{3x}(e^{7y}+e^{3y}) + 35e^{8x}(e^{8y}+e^{2y}) + 84e^{15x}(e^{9y}+e^y) + 165e^{24x}(e^{10y}+1)}{e^{4y}(e^{2y}+1) + 2e^{3x}(e^{7y}+e^{3y}) + 3e^{8x}(e^{8y}+e^{2y}) + 4e^{15x}(e^{9y}+e^y) + 5e^{24x}(e^{10y}+1)} \quad (2)$$

$$x = -\frac{J}{kT}; y = -\frac{B}{kT}$$

## C - Supporting Tables

**Table S1.** Selected crystallographic and refinement data for  $(\text{BTMA})_2[\text{Fe}_4\text{S}_4\text{Br}_4]$  (1).

|                                                | <b><math>(\text{BTMA})_2[\text{Fe}_4\text{S}_4\text{Br}_4]</math></b>  |
|------------------------------------------------|------------------------------------------------------------------------|
| $T/\text{K}$                                   | 293(2)                                                                 |
| CCDC                                           | 2048374                                                                |
| empirical formula                              | $\text{C}_{20}\text{H}_{32}\text{Br}_4\text{Fe}_4\text{N}_2\text{S}_4$ |
| formula weight/ $\text{g}\cdot\text{mol}^{-1}$ | 971.75                                                                 |
| crystal system / space group                   | monoclinic / Cc                                                        |
| $a/\text{\AA}$                                 | 12.9908(13)                                                            |
| $b/\text{\AA}$                                 | 14.8857(13)                                                            |
| $c/\text{\AA}$                                 | 17.3507(18)                                                            |
| $\beta/^\circ$                                 | 95.318(8)                                                              |
| volume/ $\text{\AA}^3 / Z$                     | 3340.8(6) / 4                                                          |

|                                                |                                                               |
|------------------------------------------------|---------------------------------------------------------------|
| $\rho_{\text{calc}}/\text{cm}^3$               | 1.932                                                         |
| $\mu/\text{mm}^{-1}$                           | 6.750                                                         |
| F(000)                                         | 1896.0                                                        |
| crystal size/ $\text{mm}^3$                    | $1.0 \times 0.2 \times 0.2$                                   |
| radiation                                      | MoK $\alpha$ ( $\lambda = 0.71073 \text{ \AA}$ )              |
| 2 $\theta$ range for data collection/ $^\circ$ | 4.172 to 54.644                                               |
| index ranges                                   | $-16 \leq h \leq 16, -19 \leq k \leq 19, -22 \leq l \leq 22$  |
| reflections collected                          | 20221                                                         |
| independent reflections                        | 7052 [ $R_{\text{int}} = 0.0426, R_{\text{sigma}} = 0.0329$ ] |
| data/restraints/parameters                     | 7052/2/308                                                    |
| goodness-of-fit on $F^2$                       | 1.087                                                         |
| final R indexes [ $I \geq 2\sigma(I)$ ]        | $R_1 = 0.0510, wR_2 = 0.1306$                                 |
| final R indexes [all data]                     | $R_1 = 0.0682, wR_2 = 0.1494$                                 |
| largest diff. peak/hole / $e \text{ \AA}^{-3}$ | 0.59/-0.61                                                    |
| Flack parameter                                | -0.005(18)                                                    |

**Table S2** Essential metrics of  $[\text{Fe}_4\text{S}_4\text{Br}_4]^{2-}$ .<sup>a</sup>

| distances   | [ $\text{\AA}$ ] | distances   | [ $\text{\AA}$ ] | distances   | [ $\text{\AA}$ ] |
|-------------|------------------|-------------|------------------|-------------|------------------|
| Fe1–S2      | 2.292(4)         | Fe3–S4      | 2.263(4)         | Fe1…Fe2     | 2.776(2)         |
| Fe1–S3      | 2.269(4)         | Fe4–S1      | 2.303(4)         | Fe1…Fe3     | 2.772(2)         |
| Fe1–S4      | 2.305(4)         | Fe4–S2      | 2.262(4)         | Fe1…Fe4     | 2.769(2)         |
| Fe2–S1      | 2.249(4)         | Fe4–S3      | 2.297(3)         | Fe2…Fe3     | 2.759(3)         |
| Fe2–S2      | 2.299(4)         | Fe1–Br1     | 2.354(2)         | Fe2…Fe4     | 2.748(2)         |
| Fe2–S4      | 2.300(4)         | Fe2–Br2     | 2.332(2)         | Fe3…Fe4     | 2.717(2)         |
| Fe3–S1      | 2.292(3)         | Fe3–Br3     | 2.332(2)         |             |                  |
| Fe3–S3      | 2.300(4)         | Fe4–Br4     | 2.340(2)         |             |                  |
| angles      | [ $^\circ$ ]     | angles      | [ $^\circ$ ]     | angles      | [ $^\circ$ ]     |
| Br3–Fe3–Fe1 | 148.63(9)        | Br2–Fe2–Fe3 | 147.03(10)       | Br1–Fe1–Fe4 | 150.38(10)       |
| Br3–Fe3–Fe2 | 145.71(10)       | Br2–Fe2–Fe4 | 145.79(11)       | Br4–Fe4–Fe1 | 151.03(10)       |
| Br3–Fe3–Fe4 | 138.53(10)       | Br1–Fe1–Fe2 | 140.06(10)       | Br4–Fe4–Fe2 | 143.34(9)        |
| Br2–Fe2–Fe1 | 141.45(10)       | Br1–Fe1–Fe3 | 144.61(9)        | Br4–Fe4–Fe3 | 138.03(10)       |
| S1–Fe4–Br4  | 108.30(11)       | S3–Fe3–Br3  | 113.41(12)       | S4–Fe2–Br2  | 114.30(13)       |
| S2–Fe4–Br4  | 120.03(12)       | S4–Fe3–Br3  | 119.66(12)       | S2–Fe1–Br1  | 115.70(12)       |
| S3–Fe4–Br4  | 115.17(12)       | S1–Fe2–Br2  | 116.39(12)       | S3–Fe1–Br1  | 118.87(12)       |
| S1–Fe3–Br3  | 110.25(11)       | S2–Fe2–Br2  | 113.43(13)       | S4–Fe1–Br1  | 110.62(12)       |
| Fe2–S1–Fe3  | 74.83(11)        | Fe1–S2–Fe4  | 75.11(12)        | Fe3–S3–Fe4  | 72.46(11)        |
| Fe2–S1–Fe4  | 74.24(11)        | Fe2–S2–Fe4  | 74.08(12)        | Fe1–S4–Fe2  | 73.93(11)        |
| Fe3–S1–Fe4  | 72.50(11)        | Fe1–S3–Fe3  | 74.69(12)        | Fe1–S4–Fe3  | 74.72(12)        |
| Fe1–S2–Fe2  | 74.19(12)        | Fe1–S3–Fe4  | 74.87(11)        | Fe2–S4–Fe3  | 74.42(11)        |

<sup>a</sup> From single crystal XRD of  $(\text{BTMA})_2[\text{Fe}_4\text{S}_4\text{Br}_4]$  (Table S1).

**Table S3.** Selected crystallographic and refinement data for  $(\text{BTMA})_2[\text{Fe}_4\text{S}_4\text{X}_2\text{Y}_2]$  with X, Y = Cl, Br, I.<sup>a</sup>

|                                       | $(\text{BTMA})_2[\text{Fe}_4\text{S}_4\text{Br}_2\text{Cl}_2]$                              |                                                                                   | $(\text{BTMA})_2[\text{Fe}_4\text{S}_4\text{Cl}_2\text{I}_2]$                              |                                                                                            |
|---------------------------------------|---------------------------------------------------------------------------------------------|-----------------------------------------------------------------------------------|--------------------------------------------------------------------------------------------|--------------------------------------------------------------------------------------------|
| T in K                                | 293(2)                                                                                      | 173(2)                                                                            | 293(2)                                                                                     | 173(2)                                                                                     |
| CCDC                                  | 2048953                                                                                     | 2048376                                                                           | 2048954                                                                                    | 2048375                                                                                    |
| empirical formula                     | $\text{C}_{20}\text{H}_{32}\text{Br}_{2.09}\text{Cl}_{1.91}\text{Fe}_4\text{N}_2\text{S}_4$ | $\text{C}_{20}\text{H}_{32}\text{Br}_2\text{Cl}_2\text{Fe}_4\text{N}_2\text{S}_4$ | $\text{C}_{20}\text{H}_{32}\text{Cl}_{1.65}\text{Fe}_4\text{I}_{2.35}\text{N}_2\text{S}_4$ | $\text{C}_{20}\text{H}_{32}\text{Cl}_{1.76}\text{Fe}_4\text{I}_{2.24}\text{N}_2\text{S}_4$ |
| formula weight in $\text{g mol}^{-1}$ | 886.95                                                                                      | 882.83                                                                            | 1008.59                                                                                    | 998.53                                                                                     |
| crystal system / space group          | monoclinic / Cc                                                                             | monoclinic / Cc                                                                   | monoclinic / Cc                                                                            | monoclinic / Cc                                                                            |
| a/ $\text{\AA}$                       | 12.8775(5)                                                                                  | 12.79122(18)                                                                      | 13.1754(3)                                                                                 | 13.0899(4)                                                                                 |
| b/ $\text{\AA}$                       | 14.7140(6)                                                                                  | 14.6187(2)                                                                        | 14.7340(4)                                                                                 | 14.6471(4)                                                                                 |
| c/ $\text{\AA}$                       | 17.3223(7)                                                                                  | 17.1838(2)                                                                        | 17.5672(4)                                                                                 | 17.4361(5)                                                                                 |
| $\beta/^\circ$                        | 95.142(3)                                                                                   | 94.8717(13)                                                                       | 96.3025(19)                                                                                | 96.225(3)                                                                                  |
| volume in $\text{\AA}^3 / Z$          | 3269.01(22) / 4                                                                             | 3201.62(8) / 4                                                                    | 3389.65(14) / 4                                                                            | 3323.28(18) / 4                                                                            |
| $\rho_{\text{calc}}$ in $\text{cm}^3$ | 1.802                                                                                       | 1.832                                                                             | 1.976                                                                                      | 1.996                                                                                      |

|                                                 |                                                               |                                                               |                                                               |                                                               |
|-------------------------------------------------|---------------------------------------------------------------|---------------------------------------------------------------|---------------------------------------------------------------|---------------------------------------------------------------|
| $\mu$ in $\text{mm}^{-1}$                       | 4.726                                                         | 4.714                                                         | 4.206                                                         | 4.197                                                         |
| F(000)                                          | 1759.0                                                        | 1752.0                                                        | 1946.0                                                        | 1930.0                                                        |
| crystal size in $\text{mm}^3$                   | $0.5 \times 0.4 \times 0.3$                                   | $0.098 \times 0.049 \times 0.012$                             | $0.8 \times 0.4 \times 0.3$                                   | $0.14 \times 0.06 \times 0.04$                                |
| $2\Theta$ range for data collection in $^\circ$ | 4.212 to 53.658                                               | 7.642 to 59.02                                                | 7.358 to 58.982                                               | 7.906 to 58.966                                               |
| index ranges                                    | $-16 \leq h \leq 16, -18 \leq k \leq 18, -21 \leq l \leq 21$  | $-17 \leq h \leq 17, -20 \leq k \leq 20, -23 \leq l \leq 23$  | $-16 \leq h \leq 17, -19 \leq k \leq 19, -23 \leq l \leq 24$  | $-18 \leq h \leq 16, -19 \leq k \leq 19, -23 \leq l \leq 21$  |
| reflections collected                           | 22278                                                         | 24700                                                         | 25715                                                         | 23842                                                         |
| independent reflections                         | 6579 [R <sub>int</sub> = 0.0637, R <sub>sigma</sub> = 0.0403] | 7728 [R <sub>int</sub> = 0.0354, R <sub>sigma</sub> = 0.0405] | 8159 [R <sub>int</sub> = 0.0810, R <sub>sigma</sub> = 0.0810] | 7917 [R <sub>int</sub> = 0.0428, R <sub>sigma</sub> = 0.0491] |
| data/restraints/parameters                      | 6579/2/311                                                    | 7728/2/372                                                    | 8159/2/344                                                    | 7917/4/373                                                    |
| goodness-of-fit on F <sup>2</sup>               | 1.074                                                         | 1.044                                                         | 1.036                                                         | 1.003                                                         |
| final R indexes [ $I \geq 2\sigma(I)$ ]         | R <sub>1</sub> = 0.0446, wR <sub>2</sub> = 0.1171             | R <sub>1</sub> = 0.0289, wR <sub>2</sub> = 0.0487             | R <sub>1</sub> = 0.0493, wR <sub>2</sub> = 0.0982             | R <sub>1</sub> = 0.0302, wR <sub>2</sub> = 0.0488             |
| final R indexes [all data]                      | R <sub>1</sub> = 0.0493, wR <sub>2</sub> = 0.1212             | R <sub>1</sub> = 0.0377, wR <sub>2</sub> = 0.0512             | R <sub>1</sub> = 0.1003, wR <sub>2</sub> = 0.1275             | R <sub>1</sub> = 0.0390, wR <sub>2</sub> = 0.0528             |
| largest diff. peak/hole in $e \text{ \AA}^{-3}$ | 0.41/-0.41                                                    | 0.35/-0.34                                                    | 0.54/-0.72                                                    | 0.44/-0.36                                                    |
| Flack parameter                                 | -0.012(19)                                                    | -0.020(9)                                                     | -0.05(4)                                                      | -0.020(18)                                                    |

<sup>a</sup> Radiation: MoK $\alpha$  ( $\lambda = 0.71073 \text{ \AA}$ ).

**Table S4.** Selected crystallographic and refinement data for (BTMA)<sub>2</sub>[Fe<sub>4</sub>S<sub>4</sub>Br<sub>2</sub>I<sub>2</sub>]

|                                                 | (BTMA) <sub>2</sub> [Fe <sub>4</sub> S <sub>4</sub> Br <sub>2</sub> I <sub>2</sub> ]                               |                                                                                                              |
|-------------------------------------------------|--------------------------------------------------------------------------------------------------------------------|--------------------------------------------------------------------------------------------------------------|
| T in K                                          | 293(2)                                                                                                             | 173(2)                                                                                                       |
| CCDC                                            | 2055695                                                                                                            | 2048378                                                                                                      |
| empirical formula                               | C <sub>20</sub> H <sub>32</sub> Br <sub>2.12</sub> Fe <sub>4</sub> I <sub>1.88</sub> N <sub>2</sub> S <sub>4</sub> | C <sub>20</sub> H <sub>32</sub> Br <sub>2</sub> Fe <sub>4</sub> I <sub>2</sub> N <sub>2</sub> S <sub>4</sub> |
| formula weight in $\text{g mol}^{-1}$           | 1059.86                                                                                                            | 1065.73                                                                                                      |
| crystal system / space group                    | monoclinic / Cc                                                                                                    | monoclinic / Cc                                                                                              |
| a/ $\text{\AA}$                                 | 13.210(2)                                                                                                          | 13.0906(3)                                                                                                   |
| b/ $\text{\AA}$                                 | 14.957(2)                                                                                                          | 14.8245(3)                                                                                                   |
| c/ $\text{\AA}$                                 | 17.513(2)                                                                                                          | 17.3176(4)                                                                                                   |
| $\beta/^\circ$                                  | 96.12(3)                                                                                                           | 95.942(2)                                                                                                    |
| volume in $\text{\AA}^3 / Z$                    | 3440.5(2) / 4                                                                                                      | 3342.63(12) / 4                                                                                              |
| $\rho_{\text{calc}}$ in $\text{cm}^3$           | 2.046                                                                                                              | 2.118                                                                                                        |
| $\mu$ in $\text{mm}^{-1}$                       | 6.060                                                                                                              | 6.203                                                                                                        |
| F(000)                                          | 2031.0                                                                                                             | 2040.0                                                                                                       |
| crystal size in $\text{mm}^3$                   | $0.5 \times 0.4 \times 0.3$                                                                                        | $0.093 \times 0.037 \times 0.02$                                                                             |
| radiation                                       | MoK $\alpha$ ( $\lambda = 0.71073 \text{ \AA}$ )                                                                   | MoK $\alpha$ ( $\lambda = 0.71073 \text{ \AA}$ )                                                             |
| $2\Theta$ range for data collection in $^\circ$ | 4.126 to 54.608                                                                                                    | 7.254 to 59.164                                                                                              |
| index ranges                                    | $-17 \leq h \leq 16, -19 \leq k \leq 19, -22 \leq l \leq 22$                                                       | $-18 \leq h \leq 17, -20 \leq k \leq 20, -24 \leq l \leq 23$                                                 |
| reflections collected                           | 26772                                                                                                              | 72621                                                                                                        |
| independent reflections                         | 7401 [R <sub>int</sub> = 0.0355, R <sub>sigma</sub> = 0.0225]                                                      | 8613 [R <sub>int</sub> = 0.0451, R <sub>sigma</sub> = 0.0290]                                                |
| data/restraints/parameters                      | 7401/2/312                                                                                                         | 8613/4/358                                                                                                   |
| goodness-of-fit on F <sup>2</sup>               | 1.062                                                                                                              | 1.046                                                                                                        |
| final R indexes [ $I \geq 2\sigma(I)$ ]         | R <sub>1</sub> = 0.0365, wR <sub>2</sub> = 0.0892                                                                  | R <sub>1</sub> = 0.0237, wR <sub>2</sub> = 0.0399                                                            |
| final R indexes [all data]                      | R <sub>1</sub> = 0.0439, wR <sub>2</sub> = 0.0960                                                                  | R <sub>1</sub> = 0.0305, wR <sub>2</sub> = 0.0421                                                            |
| largest diff. peak/hole in $e \text{ \AA}^{-3}$ | 0.69/-0.61                                                                                                         | 0.37/-0.40                                                                                                   |
| Flack parameter                                 | 0.017(12)                                                                                                          | -0.021(9)                                                                                                    |

**Table S5** Selected metrics of (BTMA)<sub>2</sub>[Fe<sub>4</sub>S<sub>4</sub>X<sub>4</sub>] and (BTMA)<sub>2</sub>[Fe<sub>4</sub>S<sub>4</sub>X<sub>2</sub>Y<sub>2</sub>] with X,Y = Cl, Br, I, Part I.

|                             | [Fe <sub>4</sub> S <sub>4</sub> Br <sub>4</sub> ] <sup>2-</sup> | [Fe <sub>4</sub> S <sub>4</sub> Br <sub>2</sub> Cl <sub>2</sub> ] <sup>2-</sup> |          | [Fe <sub>4</sub> S <sub>4</sub> Cl <sub>2</sub> I <sub>2</sub> ] <sup>2-</sup> |          | [Fe <sub>4</sub> S <sub>4</sub> Br <sub>2</sub> I <sub>2</sub> ] <sup>2-</sup> |          | [Fe <sub>4</sub> S <sub>4</sub> I <sub>4</sub> ] <sup>2-a</sup> |
|-----------------------------|-----------------------------------------------------------------|---------------------------------------------------------------------------------|----------|--------------------------------------------------------------------------------|----------|--------------------------------------------------------------------------------|----------|-----------------------------------------------------------------|
| $\delta$ in $\text{g/cm}^3$ | 1.932                                                           | 1.802                                                                           |          | 1.976                                                                          |          | 2.046                                                                          |          | 2.192                                                           |
| distances                   | in $\text{\AA}$                                                 | in $\text{\AA}$                                                                 |          | in $\text{\AA}$                                                                |          | in $\text{\AA}$                                                                |          | in $\text{\AA}$                                                 |
| T in K                      | 293                                                             | 293                                                                             | 173      | 293                                                                            | 173      | 293                                                                            | 173      | 293                                                             |
| Fe(1)···Fe(2)               | 2.776(2)                                                        | 2.775(2)                                                                        | 2.738(1) | 2.767(2)                                                                       | 2.748(1) | 2.766(2)                                                                       | 2.718(1) | 2.759(2)                                                        |

|                                                            |                                                                                                  |                                                                                                                         |                                                                                                                          |                                                                                                               |                                                                                                                |                                                                                                                     |                                                                                                                  |                                                                                    |
|------------------------------------------------------------|--------------------------------------------------------------------------------------------------|-------------------------------------------------------------------------------------------------------------------------|--------------------------------------------------------------------------------------------------------------------------|---------------------------------------------------------------------------------------------------------------|----------------------------------------------------------------------------------------------------------------|---------------------------------------------------------------------------------------------------------------------|------------------------------------------------------------------------------------------------------------------|------------------------------------------------------------------------------------|
| Fe(1)···Fe(3)                                              | 2.772(2)                                                                                         | 2.773(2)                                                                                                                | 2.750(1)                                                                                                                 | 2.760(2)                                                                                                      | 2.748(1)                                                                                                       | 2.765(2)                                                                                                            | 2.703(1)                                                                                                         | 2.756(2)                                                                           |
| Fe(1)···Fe(4)                                              | 2.769(2)                                                                                         | 2.765(2)                                                                                                                | 2.767(1)                                                                                                                 | 2.758(3)                                                                                                      | 2.751(1)                                                                                                       | 2.758(2)                                                                                                            | 2.749(1)                                                                                                         | 2.754(2)                                                                           |
| Fe(2)···Fe(3)                                              | 2.759(3)                                                                                         | 2.762(2)                                                                                                                | 2.763(1)                                                                                                                 | 2.750(2)                                                                                                      | 2.755(1)                                                                                                       | 2.757(2)                                                                                                            | 2.746(1)                                                                                                         | 2.750(2)                                                                           |
| Fe(2)···Fe(4)                                              | 2.748(2)                                                                                         | 2.748(2)                                                                                                                | 2.738(1)                                                                                                                 | 2.734(3)                                                                                                      | 2.731(1)                                                                                                       | 2.735(2)                                                                                                            | 2.742(1)                                                                                                         | 2.726(2)                                                                           |
| Fe(3)···Fe(4)                                              | 2.717(2)                                                                                         | 2.725(2)                                                                                                                | 2.719(1)                                                                                                                 | 2.725(3)                                                                                                      | 2.731(1)                                                                                                       | 2.716(2)                                                                                                            | 2.737(1)                                                                                                         | 2.696(2)                                                                           |
| avd. value                                                 | 2.757(22)                                                                                        | 2.758(2)                                                                                                                | 2.746(1)                                                                                                                 | 2.749(2)                                                                                                      | 2.744(1)                                                                                                       | 2.749(8)                                                                                                            | 2.733(1)                                                                                                         | 2.740(2)                                                                           |
| Fe1–X/Y                                                    | 2.354(2)                                                                                         | 2.335(2)                                                                                                                | 2.210(1)<br>2.323(5)                                                                                                     | 2.548(2)                                                                                                      | 2.551(1)                                                                                                       | 2.524(1)                                                                                                            | 2.367(1)<br>2.514(1)                                                                                             | 2.557(2)                                                                           |
| Fe2–X/Y                                                    | 2.332(2)                                                                                         | 2.295(2)                                                                                                                | 2.342(3)<br>2.340(2)                                                                                                     | 2.500(5)<br>2.495(4)                                                                                          | 2.248(1)<br>2.360(2)                                                                                           | 2.477(1)                                                                                                            | 2.409(1)<br>2.545(4)                                                                                             | 2.522(2)                                                                           |
| Fe3–X/Y                                                    | 2.332(2)                                                                                         | 2.284(2)                                                                                                                | 2.223(1)<br>2.330(1)                                                                                                     | 2.230(2)<br>2.340(3)                                                                                          | 2.2400(2)<br>2.5126(2)                                                                                         | 2.380(2)                                                                                                            | 2.452(1)<br>2.479(4)                                                                                             | 2.520(3)                                                                           |
| Fe4–X/Y                                                    | 2.340(2)                                                                                         | 2.256(2)                                                                                                                | 2.200(1)<br>2.316(1)                                                                                                     | 2.560(3)<br>2.399(1)                                                                                          | 2.237(15)<br>2.483(4)                                                                                          | 2.438(2)                                                                                                            | 2.368(4)<br>2.411(1)                                                                                             | 2.495(3)                                                                           |
| X/Y···X/Y <sup>b</sup><br>distances<br>between<br>clusters | Br3···Br4<br>3.814(2)<br>Br2···Br4<br>4.871(3)<br>Br1···Br2<br>5.238(3)<br>Br1···Br4<br>5.328(3) | Br/Cl3···Br/Cl4<br>3.75(2)<br>Br/Cl2···Br/Cl4<br>5.299(2)<br>Br/Cl1···Br/Cl2<br>5.161(2)<br>Br/Cl1···Br4Cl4<br>5.439(3) | Br/Cl3···Br/C<br>14 3.75(2)<br>Br/Cl2···Br/C<br>14 5.39(3)<br>Br/Cl1···Br/C<br>12 5.18(3)<br>Br/Cl1···Br/C<br>14 5.25(4) | I/Cl3···I/Cl4<br>3.80(4)<br>I/Cl2···I/Cl4<br>4.77(4)<br>Br/Cl1···I/Cl2<br>4.87(3)<br>I/Cl1···I/Cl4<br>5.31(3) | I/Cl3···I/Cl4<br>3.74(2)<br>I/Cl1···I/Cl3<br>4.87(2)<br>Br/Cl1···I/Cl2<br>4.952(6)<br>I/Cl1···I/Cl4<br>5.30(3) | I/Br3···I/Br4<br>3.849(25)<br>I/Br2···I/Br4<br>5.340(1)<br>Br/Br1···I/Br<br>2 5.086(1)<br>I/Br1···I4Br4<br>6.987(2) | I/Br3···I/Br4<br>3.79(3)<br>I/Br1···I/Br3<br>4.59(5)<br>Br/Br1···I/Br<br>2 5.137(14)<br>I/Br1···I/Br4<br>5.27(3) | I3···I4<br>3.918(2)<br>I2···I3<br>4.510<br>I1···I4<br>5.121<br>I1···I3<br>5.413(2) |

<sup>a</sup> From Ref. 6. <sup>b</sup> Shorter distances; for mixed clusters, distances correspond to the average values.

**Table S6** Selected metrics of (BTMA)<sub>2</sub>[Fe<sub>4</sub>S<sub>4</sub>X<sub>4</sub>] and (BTMA)<sub>2</sub>[Fe<sub>4</sub>S<sub>4</sub>X<sub>2</sub>Y<sub>2</sub>] with X,Y = Cl, Br, I, Part II.

| column                        | 1                     | 2               | 3                                   | 4               | 5        | 6      | 7                                  | 8               | 9        | 10     |
|-------------------------------|-----------------------|-----------------|-------------------------------------|-----------------|----------|--------|------------------------------------|-----------------|----------|--------|
|                               | <b>Br<sub>4</sub></b> | $\Delta$ to av. | <b>Br<sub>2</sub>Cl<sub>2</sub></b> | $\Delta$ to av. |          |        | <b>Cl<sub>2</sub>I<sub>2</sub></b> | $\Delta$ to av. |          |        |
| $\delta$ in g/cm <sup>3</sup> | 1.932                 |                 | 1.802                               |                 |          |        | 1.976                              |                 |          |        |
| T in K                        | 293                   |                 | 293                                 |                 | 173      |        | 293                                |                 | 173      |        |
| Fe(1)···Fe(2)                 | 2.776(2)              | +0.019          | 2.775(2)                            | +0.017          | 2.767(1) | +0.021 | 2.767(2)                           | +0.018          | 2.755(1) | +0.011 |
| Fe(1)···Fe(3)                 | 2.772(2)              | +0.015          | 2.773(2)                            | +0.015          | 2.763(1) | +0.017 | 2.760(2)                           | +0.011          | 2.751(1) | +0.007 |
| Fe(1)···Fe(4)                 | 2.769(2)              | +0.012          | 2.765(2)                            | +0.007          | 2.750(1) | +0.004 | 2.758(3)                           | +0.009          | 2.748(1) | +0.005 |
| Fe(2)···Fe(3)                 | 2.759(3)              | +0.002          | 2.762(2)                            | +0.004          | 2.738(1) | –0.008 | 2.750(2)                           | +0.001          | 2.748(1) | +0.004 |
| Fe(2)···Fe(4)                 | 2.748(2)              | –0.009          | 2.748(2)                            | –0.010          | 2.738(1) | –0.008 | 2.734(3)                           | –0.006          | 2.731(1) | –0.013 |
| Fe(3)···Fe(4)                 | 2.717(2)              | –0.040          | 2.725(2)                            | –0.033          | 2.719(1) | –0.027 | 2.725(3)                           | –0.024          | 2.731(1) | –0.013 |
| avd. value                    | 2.757(2)              |                 | 2.758(2)                            |                 | 2.746(1) |        | 2.749(2)                           |                 | 2.744(1) |        |
| largest $\Delta$ <sup>a</sup> | 0.059                 |                 | 0.050                               |                 | 0.048    |        | 0.042                              |                 | 0.024    |        |

| column                        | 11                                 | 12              | 13       | 14     | 15                               | 16              |
|-------------------------------|------------------------------------|-----------------|----------|--------|----------------------------------|-----------------|
|                               | <b>Br<sub>2</sub>I<sub>2</sub></b> | $\Delta$ to av. |          |        | <b>I<sub>4</sub><sup>a</sup></b> | $\Delta$ to av. |
| $\delta$ in g/cm <sup>3</sup> | 2.046                              |                 |          |        | 2.192                            |                 |
| T in K                        | 293                                |                 | 173      |        | 293                              |                 |
| Fe(1)···Fe(2)                 | 2.766(2)                           | +0.017          | 2.749(1) | +0.016 | 2.759(3)                         | +0.019          |
| Fe(1)···Fe(3)                 | 2.765(2)                           | +0.016          | 2.746(1) | +0.013 | 2.756(2)                         | +0.016          |
| Fe(1)···Fe(4)                 | 2.757(2)                           | +0.008          | 2.742(1) | +0.009 | 2.754(3)                         | +0.014          |
| Fe(2)···Fe(3)                 | 2.758(2)                           | +0.009          | 2.737(1) | +0.004 | 2.750(3)                         | +0.010          |
| Fe(2)···Fe(4)                 | 2.735(2)                           | –0.014          | 2.718(1) | –0.015 | 2.726(3)                         | –0.014          |
| Fe(3)···Fe(4)                 | 2.716(2)                           | –0.033          | 2.703(1) | –0.030 | 2.696(3)                         | –0.440          |
| avd. value                    | 2.749(8)                           |                 | 2.733(1) |        | 2.740(2)                         |                 |
| largest $\Delta$ <sup>a</sup> | 0.050                              |                 | 0.043    |        | 0.063                            |                 |

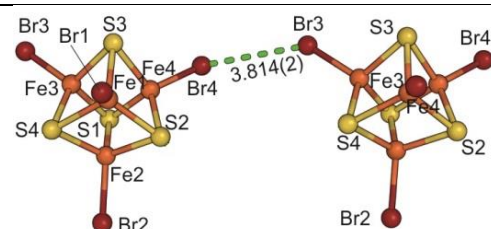

numbering scheme

<sup>a</sup> Difference between smallest and largest value. <sup>b</sup> From Ref. 4.

**Table S7** Metrical data showing the Fe<sub>4</sub> tetrahedron distortion and compression in (Q)<sub>2</sub>[Fe<sub>4</sub>S<sub>4</sub>X<sub>4</sub>] and (Q)<sub>2</sub>[Fe<sub>4</sub>S<sub>4</sub>X<sub>2</sub>Y<sub>2</sub>] structures with X, Y = Cl, Br, I and Q = Ph<sub>4</sub>P<sup>+</sup>, Et<sub>4</sub>N<sup>+</sup>, and nPr<sub>4</sub>N<sup>+</sup>.

|                                  | Ph <sub>4</sub> P <sup>+</sup>                                  |                                                                                 |                                                                 |                                                                |                                                                   | Et <sub>4</sub> N <sup>+</sup>                                  | nPr <sub>4</sub> N <sup>+</sup>                                 |
|----------------------------------|-----------------------------------------------------------------|---------------------------------------------------------------------------------|-----------------------------------------------------------------|----------------------------------------------------------------|-------------------------------------------------------------------|-----------------------------------------------------------------|-----------------------------------------------------------------|
| cluster                          | [Fe <sub>4</sub> S <sub>4</sub> Cl <sub>4</sub> ] <sup>2-</sup> | [Fe <sub>4</sub> S <sub>4</sub> Br <sub>2</sub> Cl <sub>2</sub> ] <sup>2-</sup> | [Fe <sub>4</sub> S <sub>4</sub> Br <sub>4</sub> ] <sup>2-</sup> | [Fe <sub>4</sub> S <sub>4</sub> I <sub>4</sub> ] <sup>2-</sup> | [Fe <sub>4</sub> S <sub>4</sub> (SH) <sub>4</sub> ] <sup>2-</sup> | [Fe <sub>4</sub> S <sub>4</sub> Cl <sub>4</sub> ] <sup>2-</sup> | [Fe <sub>4</sub> S <sub>4</sub> Cl <sub>4</sub> ] <sup>2-</sup> |
| refs                             | [5]                                                             | [5]                                                                             | [5]                                                             | [6]                                                            | [7]                                                               | [8]                                                             | [9]                                                             |
| space group                      | C2/c                                                            | C2/c                                                                            | C2/c                                                            | I4 <sub>1</sub> /a                                             | C2/c                                                              | P2 <sub>1</sub> /c                                              | P2 <sub>1</sub> /n                                              |
| density in g/cm <sup>3</sup>     | 1.55                                                            | 1.65                                                                            | 1.76                                                            | 1.90                                                           | 1.50                                                              | 1.63                                                            | 1.45                                                            |
| T in K                           | 294                                                             | 294                                                                             | 294                                                             | 283–303                                                        | 294                                                               | 283–303                                                         | 213                                                             |
| distances in Å                   |                                                                 |                                                                                 |                                                                 |                                                                |                                                                   |                                                                 |                                                                 |
| Fe(1)···Fe(2)                    | 2.778(1)                                                        | 2.777(2)                                                                        | 2.767(2)                                                        | 2.743(2)                                                       | 2.770(3)                                                          | 2.777(1)                                                        | 2.789(1)                                                        |
| Fe(1)···Fe(1b)                   | 2.775(2)                                                        | 2.765(4)                                                                        | 2.747(3)                                                        | 2.755(2)                                                       | 2.762(4)                                                          | 2.746(1)                                                        | 2.769(1)                                                        |
| Fe(1)···Fe(2b)                   | 2.773(1)                                                        | 2.769(3)                                                                        | 2.760(2)                                                        | 2.755(2)                                                       | 2.769(3)                                                          | 2.776(1)                                                        | 2.770(1)                                                        |
| Fe(1b)···Fe(2b)                  | 2.773(1)                                                        | 2.769(3)                                                                        | 2.760(2)                                                        | 2.755(2)                                                       | 2.769(3)                                                          | 2.765(1)                                                        | 2.768(1)                                                        |
| Fe(2)···Fe(2b)                   | 2.751(2)                                                        | 2.760(3)                                                                        | 2.767(2)                                                        | 2.755(2)                                                       | 2.738(3)                                                          | 2.764(1)                                                        | 2.771(1)                                                        |
| Fe(2)···Fe(1b)                   | 2.778(1)                                                        | 2.777(2)                                                                        | 2.767(2)                                                        | 2.743(2)                                                       | 2.770(3)                                                          | 2.765(1)                                                        | 2.753(1)                                                        |
| averaged value                   | 2.771(10)                                                       | 2.770(7)                                                                        | 2.761(8)                                                        | 2.751(6)                                                       | 2.763(13)                                                         | 2.766(11)                                                       | 2.770(12)                                                       |
| largest Δ in Å <sup>a</sup>      | 0.027                                                           | 0.017                                                                           | 0.020                                                           | 0.012                                                          | 0.032                                                             | 0.031                                                           | 0.036                                                           |
| Fe–X                             | 2.204(3)<br>2.211(3)                                            | 2.321(3) (Br/Cl)<br>2.291(3) (Br/Cl)                                            | 2.338(2)<br>2.345(2)                                            | 2.541(1)                                                       | 2.269(5)<br>2.256(4)                                              | 2.216                                                           | 2.210(1)<br>2.212(1)<br>2.197(1)                                |
| X···X distances between clusters | No data available                                               | No data available                                                               | 4.040(1)<br>6.846(1)<br>6.874(1)                                | 4.336(1)<br>6.441(1)<br>9.163(1)                               | 4.240(1)                                                          | 3.964(1)<br>4.599(1)<br>4.751(1)<br>5.536(1)                    | 4.391(1)<br>4.711(1)<br>7.113(1)                                |

<sup>a</sup> Difference between smallest and largest value.

**Table S8** Selected crystallographic and refinement data for (BTMA)<sub>3</sub>[Fe<sub>6</sub>S<sub>6</sub>Cl<sub>6</sub>] (6)

|                                       |                                                                                               |                                            |                                                                |
|---------------------------------------|-----------------------------------------------------------------------------------------------|--------------------------------------------|----------------------------------------------------------------|
| formula                               | C <sub>30</sub> H <sub>48</sub> Cl <sub>6</sub> Fe <sub>6</sub> N <sub>3</sub> S <sub>6</sub> | radiation                                  | MoKα (λ = 0.71073 Å)                                           |
| formula weight in g mol <sup>-1</sup> | 1190.87                                                                                       | T in K                                     | 293(2)                                                         |
| size in mm                            | 1.0 × 0.5 × 0.3                                                                               | F(000)                                     | 1206.0                                                         |
| crystal system                        | triclinic                                                                                     | Q <sub>calc</sub> /cm <sup>3</sup>         | 1.626                                                          |
| space group                           | P $\bar{1}$                                                                                   | 2θ range data collection/°                 | 3.418 to 53.628                                                |
| a/Å                                   | 10.2381(5)                                                                                    | index ranges                               | -11 ≤ h ≤ 12, -15 ≤ k ≤ 15, -25 ≤ l ≤ 25                       |
| b/Å                                   | 12.3598(6)                                                                                    | reflections collected                      | 33479                                                          |
| c/Å                                   | 19.934(1)                                                                                     | independent reflections                    | 10306 [R <sub>int</sub> = 0.1106, R <sub>sigma</sub> = 0.0729] |
| α/°                                   | 104.898(4)                                                                                    | data/restraints/parameters                 | 10306/0/469                                                    |
| β/°                                   | 89.793(4)                                                                                     | goodness-of-fit on F <sup>2</sup>          | 0.998                                                          |
| γ/°                                   | 93.675(4)                                                                                     | final R indexes [I ≥ 2σ (I)]               | R <sub>1</sub> = 0.0387, wR <sub>2</sub> = 0.0938              |
| Volume in Å <sup>3</sup> / Z          | 2432.4(2) / 2                                                                                 | Final R indexes [all data]                 | R <sub>1</sub> = 0.0589, wR <sub>2</sub> = 0.1066              |
| μ in mm <sup>-1</sup>                 | 2.354                                                                                         | Larg. diff. peak/hole in e Å <sup>-3</sup> | 0.53/-0.61                                                     |
| CCDC                                  | 2048377                                                                                       |                                            |                                                                |

**Table S9** Essential metrics in [Fe<sub>6</sub>S<sub>6</sub>Cl<sub>6</sub>]<sup>3-</sup>.<sup>a</sup>

| distances | in Å       | distances | in Å       | distances | in Å      |
|-----------|------------|-----------|------------|-----------|-----------|
| Fe1–Cl1   | 2.2036(10) | Fe5–Cl5   | 2.1949(11) | Fe2···Fe3 | 2.7536(6) |
| Fe2–Cl2   | 2.2178(10) | Fe6–Cl6   | 2.2128(10) | Fe4···Fe5 | 2.7603(6) |



|            |            |           |            |            |            |
|------------|------------|-----------|------------|------------|------------|
| Fe3–Cl3    | 2.2130(11) | Fe1…Fe2   | 2.7628(7)  | Fe4…Fe6    | 2.7752(6)  |
| Fe4–Cl4    | 2.2146(10) | Fe1…Fe3   | 2.7614(7)  | Fe5…Fe6    | 2.7620(7)  |
| Fe1–S1     | 2.2930(9)  | Fe3–S1    | 2.2759(10) | Fe5–S4     | 2.2754(9)  |
| Fe1–S2     | 2.2695(9)  | Fe3–S2    | 2.2912(9)  | Fe5–S5     | 2.2810(9)  |
| Fe1–S3     | 2.2649(10) | Fe3–S3    | 2.2655(9)  | Fe5–S6     | 2.2740(9)  |
| Fe2–S1     | 2.2792(10) | Fe4–S4    | 2.2682(9)  | Fe6–S4     | 2.2964(9)  |
| Fe2–S2     | 2.2703(9)  | Fe4–S5    | 2.2659(9)  | Fe6–S5     | 2.2755(10) |
| Fe2–S3     | 2.2893(9)  | Fe4–S6    | 2.2854(9)  | Fe6–S6     | 2.2736(10) |
| angles     | in °       | angles    | in °       | angles     | in °       |
| Cl1–Fe1–S1 | 113.07(4)  | S2–Fe1–S1 | 105.62(4)  | Fe2–S1–Fe1 | 74.35(3)   |
| Cl1–Fe1–S2 | 111.94(4)  | S3–Fe1–S1 | 105.63(4)  | Fe3–S1–Fe1 | 74.37(3)   |
| Cl1–Fe1–S3 | 109.90(5)  | S3–Fe1–S2 | 110.44(3)  | Fe3–S1–Fe2 | 113.02(3)  |
| Cl2–Fe2–S1 | 111.76(4)  | S1–Fe2–S3 | 105.28(4)  | Fe1–S2–Fe2 | 114.70(4)  |
| Cl2–Fe2–S2 | 109.29(4)  | S2–Fe2–S1 | 111.54(4)  | Fe1–S2–Fe3 | 74.52(3)   |
| Cl2–Fe2–S3 | 113.19(4)  | S2–Fe2–S3 | 105.60(3)  | Fe2–S2–Fe3 | 74.26(3)   |
| Cl3–Fe3–S1 | 111.84(4)  | S1–Fe3–S2 | 105.47(4)  | Fe1–S3–Fe2 | 74.70(3)   |
| Cl3–Fe3–S2 | 113.63(4)  | S3–Fe3–S1 | 111.83(4)  | Fe1–S3–Fe3 | 114.64(4)  |
| Cl3–Fe3–S3 | 108.26(5)  | S3–Fe3–S2 | 105.69(3)  | Fe3–S3–Fe2 | 74.39(3)   |
| Cl4–Fe4–S4 | 109.02(4)  | S4–Fe4–S5 | 112.72(4)  | Fe4–S4–Fe5 | 114.13(4)  |
| Cl4–Fe4–S5 | 111.60(4)  | S4–Fe4–S6 | 105.31(3)  | Fe4–S4–Fe6 | 74.88(3)   |
| Cl4–Fe4–S6 | 112.62(4)  | S5–Fe4–S6 | 105.42(3)  | Fe6–S4–Fe5 | 74.34(3)   |
| Cl5–Fe5–S4 | 109.83(5)  | S5–Fe5–S4 | 105.75(4)  | Fe4–S5–Fe5 | 74.76(3)   |
| Cl5–Fe5–S5 | 115.96(5)  | S6–Fe5–S4 | 110.81(3)  | Fe4–S5–Fe6 | 113.36(4)  |
| Cl5–Fe5–S6 | 109.08(5)  | S6–Fe5–S5 | 105.29(3)  | Fe5–S5–Fe6 | 74.63(3)   |
| Cl6–Fe6–S4 | 114.26(4)  | S4–Fe6–S5 | 105.24(3)  | Fe5–S6–Fe4 | 74.52(3)   |
| Cl6–Fe6–S5 | 111.42(4)  | S6–Fe6–S4 | 104.78(3)  | Fe6–S6–Fe4 | 75.00(3)   |
| Cl6–Fe6–S6 | 109.05(4)  | S6–Fe6–S5 | 111.92(4)  | Fe6–S6–Fe5 | 114.96(4)  |

<sup>a</sup> From single crystal XRD of (BTMA)<sub>3</sub>[Fe<sub>6</sub>S<sub>6</sub>Cl<sub>6</sub>]. Colour code: Fe–S between six-membered chairs; S–Fe–S inside chair; Fe–S–Fe inside chair.

**Table S10** Freely refined halide ratios in (BTMA)<sub>2</sub>[Fe<sub>4</sub>S<sub>4</sub>X<sub>2</sub>Y<sub>2</sub>] structures.<sup>a</sup>

|          |      |          |      |          |      |
|----------|------|----------|------|----------|------|
| <b>2</b> |      | <b>3</b> |      | <b>4</b> |      |
| Br       | Cl   | Cl       | I    | Br       | I    |
| 2.00     | 2.00 | 1.76     | 2.24 | 2.00     | 2.00 |

<sup>a</sup> From a preliminary refinement with X and Y occupancies freely refined from single crystal XRD at 173 K (full final data from refinement using SUMP in Tables S3 and S4).

## References

- 1 A. O. Schüren, V. K. Gramm, M. Dürr and A. Foi, I. Ivanović-Burmazović, F. Doctorovich, U. Ruschewitz and A. Klein, Halide coordinated homoleptic  $[\text{Fe}_4\text{S}_4\text{X}_4]^{2-}$  and heteroleptic  $[\text{Fe}_4\text{S}_4\text{X}_2\text{Y}_2]^{2-}$  clusters (X, Y = Cl, Br, I)—alternative preparations, structural analogies and spectroscopic properties in solution and solid state, *Dalton Trans.* 2016, **45**, 361–375.
- 2 D. J. Evans, G. García, M. D. Santana and M. C. Torralba, About the synthesis of the prismane  $[\text{NEt}_4]_2[\text{Fe}_6\text{S}_6\text{I}_6]$ , *Inorg. Chim. Acta* 1999, **284**, 296–299.
- 3 K. Ôno, A. Ito and T. Fujita, The Mössbauer Study of the Ferrous Ion in  $\text{FeCl}_2$ ; *J. Phys. Soc. Jpn.* 1964, **19**, 2119–2126.
- 4 G. B. Wong, M. A. Bobrik and R. H. Holm, Inorganic Derivatives of Iron Sulfide Thiolate Dimers and Tetramers: Synthesis and Properties of the Halide Series  $[\text{Fe}_2\text{S}_2\text{X}_4]^{2-}$  and  $[\text{Fe}_4\text{S}_4\text{X}_4]^{2-}$  (X = Cl, Br, I), *Inorg. Chem.* 1978, **17**, 578–584.
- 5 A. Müller, N. H. Schladerbeck, E. Krickemeyer, H. Bögge, K. Schmitz, E. Bill and A. X. Trautwein, Darstellung von Metall-Schwefel-Clustern durch einfache Reaktion von Metallsalzen mit  $\text{H}_2\text{S}$ :  $\text{R}_2(\text{NH}_4)[\text{Cu}_3\text{S}_{12}]$ ,  $\text{R}_2[\text{Cu}_4\text{S}_{12}]\cdot\text{CH}_3\text{CN}$ ,  $\text{R}_2[\text{Cu}_4\text{S}_{12.8}]$ ,  $\text{R}_2[\text{Fe}_2\text{S}_2(\text{S}_5)_2]$ ,  $\text{R}_2[\text{Fe}_4\text{S}_4\text{Br}_4]$ ,  $\text{R}_2[\text{Fe}_4\text{S}_4\text{Br}_2\text{Cl}_2]$ ,  $\text{R}_2[\text{Fe}_4\text{S}_4\text{Cl}_4]$ ,  $\text{R}_2[\text{Fe}_2\text{S}_2\text{Cl}_4]$  (R =  $\text{PPh}_4$ ) und  $[\text{Fe}(\text{DMF})_6][\text{Fe}_2\text{S}_2\text{Cl}_4]$ , *Z. Anorg. Allg. Chem.* 1989, **570**, 7–36.
- 6 S. Pohl and W. Saak, Structural Distortion of  $\text{Fe}_4\text{S}_4\text{I}_4^{2-}$  Clusters through Iodine-Iodine Contacts: Crystal Structures of  $(\text{Ph}_4\text{P})_2\text{Fe}_4\text{S}_4\text{I}_4$  and  $(\text{Me}_3\text{NCH}_2\text{Ph})_2\text{Fe}_4\text{S}_4\text{I}_4$ , *Z. Naturforsch. b* 1988, **43b**, 457–462.
- 7 A. Müller, N. H. Schladerbeck and H. Bögge,  $[\text{Fe}_4\text{S}_4(\text{SH})_4]^{2-}$ , the simplest synthetic analogue for a ferredoxin *Chem. Commun.* **1987**, 35–36.
- 8 M. A. Bobrik, K. O. Hodgson and R. H. Holm, Inorganic Derivatives of Iron-Sulfide-Thiolate Dimers and Tetramers. Structures of Tetrachloro-*p*-disulfido-diferrate(III) and Tetrakis(chloro- $\mu_3$ -sulfido-iron) Dianions, *Inorg. Chem.* 1977, **16**, 1851–1858.
- 9 B. M. Segal, H. R. Hoveyda and R. H. Holm, Terminal Ligand Assignments Based on Trends in Metal-Ligand Bond Lengths of Cubane-Type  $[\text{Fe}_4\text{S}_4]^{2+,+}$  Clusters. *Inorg. Chem.* 1998, **37**, 3440–3443.
- 10 J. T. Henthorn, G. E. Cutsail, T. Weyhermüller and S. DeBeer, Stabilization of intermediate spin states in mixed-valent diiron dichalcogenide complexes, *Nat. Chem.* 2022, **14**, 328–333.
